# Supplementary material for: Five new multifunctional inorganic–organic hybrids based on Keggin-type polyoxometalates and a 3,5-di(1H-imidazol-1-yl)benzoic acid ligand
Source: Royal Society of Chemistry journal article supplement (doi:10.1039/d2ce01634f), 2023-01-01
Supplement: d2ce01634f1.pdf [file d2ce01634f1.pdf]

Electronic Supplementary Material (ESI) for CrystEngComm.  
This journal is © The Royal Society of Chemistry 2022

## Electronic Supplementary Information (EIS)

Five new multifunctional inorganic-organic hybrids based on Keggin-type polyoxometalates and 3,5-di(1H-imidazol-1-yl)benzoic acid ligand

Xiao-yang Yu<sup>a,\*</sup>, Yanxin Lv<sup>a</sup>, Xiaoyu Weng<sup>a</sup>, Jiaqi Geng<sup>a</sup>, Yanyan Yang<sup>a</sup>, Hua Jin<sup>a</sup>, Hao Cui<sup>a</sup>, Bo Fu<sup>a</sup>, Xiaoshu Qu<sup>a,\*</sup>, Hongfei Shi<sup>a</sup>, Xueling Cao<sup>b,\*</sup>

<sup>a</sup> *Jilin Institute of Chemical Technology, Jilin City, 132022, P. R. China.*

<sup>b</sup> *College of Science, Qiongtai Normal University, Hainan, 571100, P. R. China.*

\* Corresponding author.

E-mail address: yangyangyu@jlct.edu.cn; xiaoshuqu@jlct.edu.cn

Fig. S1 XRD patterns of **1** (a), **2** (b), **3** (c), **4** (d) and **5** (e): the simulated XRD pattern, experimental XRD pattern and immersed in aqueous solutions with different pH values.

Fig. S2 The IR curves of compounds **1-5** and HDIBA.

Fig. S3 The TG curves of compounds **1-5**.

Fig. S4 Fluorescent spectra of compounds **3-5** and HDIBA in the solid state at room temperature.

Fig. S5 The relationships between peak currents and scan rates of **2-**, **4-** and **5-**CPEs.

Fig. S6 Amperometric current response of **4**-CPE to  $\text{BrO}_3^-$  in aqueous solution after the addition of various inorganic ions after 6 months.

Fig. S7 Absorption spectra of RhB (a-d), MB (e-h), CV (i-h) and MG (m-p) solutions under 300 W Xe light with full spectrum in the presence of compounds **2-5**.

Fig. S8 Absorption spectra of RhB (40 ppm) after 6 h dark reaction in the presence of compound **1** under 300 W Xe light with full spectrum.

Fig. S9 Cycling experiments of compounds **2** (a), **3** (b), **4** (c) and **5** (d) on photolysis of RhB, MB, CV and MG.

Fig. S10 XRD patterns of **2-5**: the simulated XRD pattern of **2-5**, experimental XRD pattern of **2-5** before and after photocatalytic degradation.

Fig. S11 Adsorption rate plots of RhB (a), MB (b), CV (c) and MG (d) solutions in the absence of light in the presence of compounds **2-5**.

Fig. S12 Absorption spectra of RhB (a), MB (b), CV (c), BR2(d), ABR4 (e) and MO (f) solutions during the adsorption in the presence of compound **1**.

Fig. S13 Recyclability of RhB, MB, CV, BR2 and ABR4 adsorbed by compound **1**.

Fig. S14 XRD patterns of **1**: the simulated XRD pattern of **1**, experimental XRD pattern of **1** before and after absorption.

Fig. S15 The inhibition zones of antibacterial tests of **3** (a), **4** (b) and **5** (c) against *E. coli*; **3** (d), **4** (e) and **5** (f) against *R. solanacearum*; **3** (g), **4** (h) and **5** (i) against *B. subtilis*; **3** (j), **4** (k) and **5** (l) against *C. albicans*.

Table S1. Selected bond lengths (Å) and bond angles (°) for compounds **1-5**.

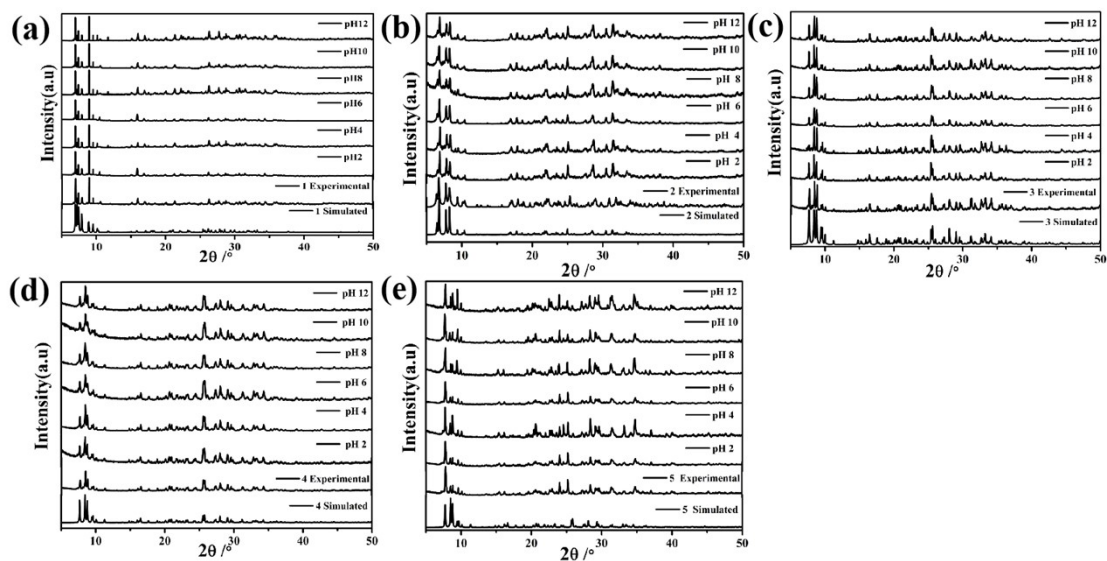

Fig. S1 XRD patterns of **1** (a), **2** (b), **3** (c), **4** (d) and **5** (e): the simulated XRD pattern, experimental XRD pattern and immersed in aqueous solutions with different pH values.

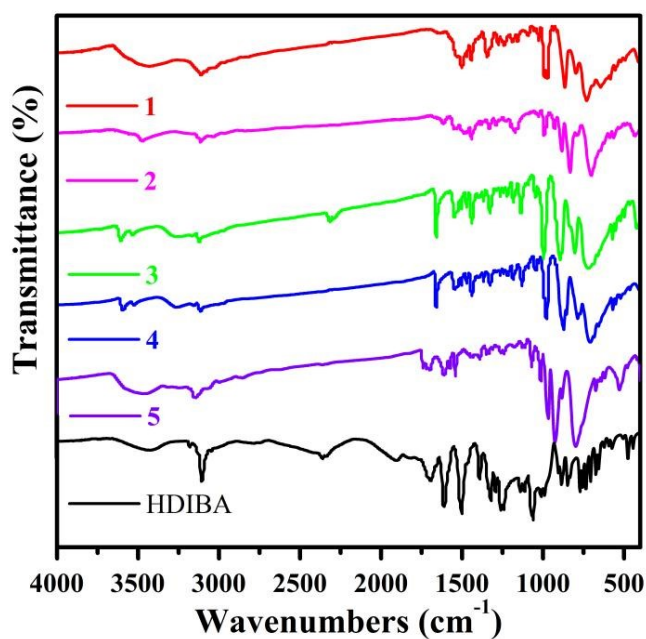

Fig. S2 The IR curves of compounds **1-5** and HDIBA.

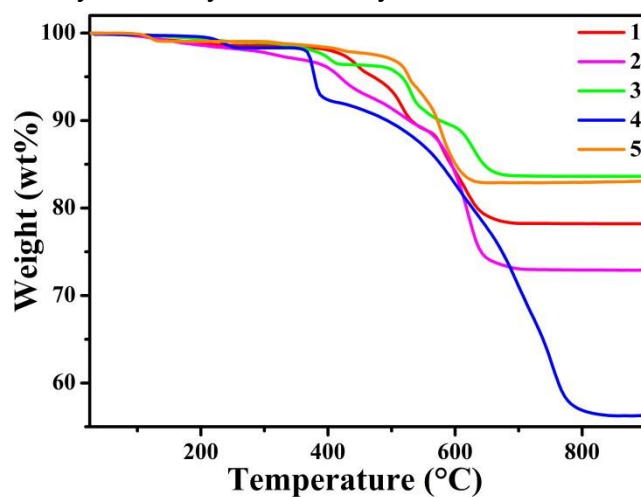

Fig. S3 The TG curves of compounds 1-5.

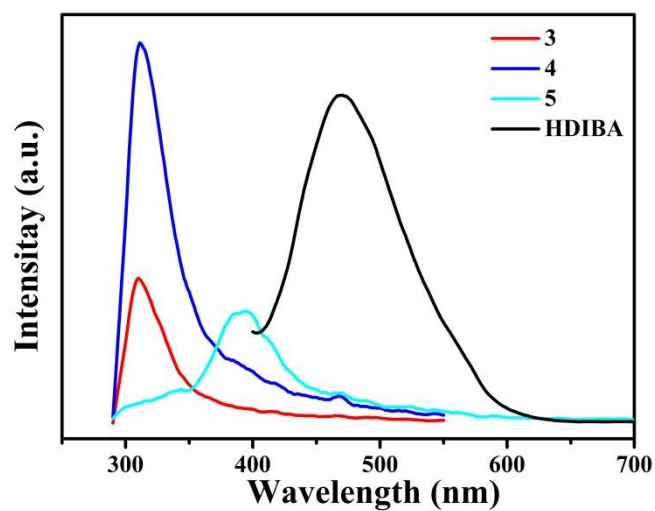

Fig. S4 Fluorescent spectra of compounds 3-5 and HDIBA in the solid state at room temperature.

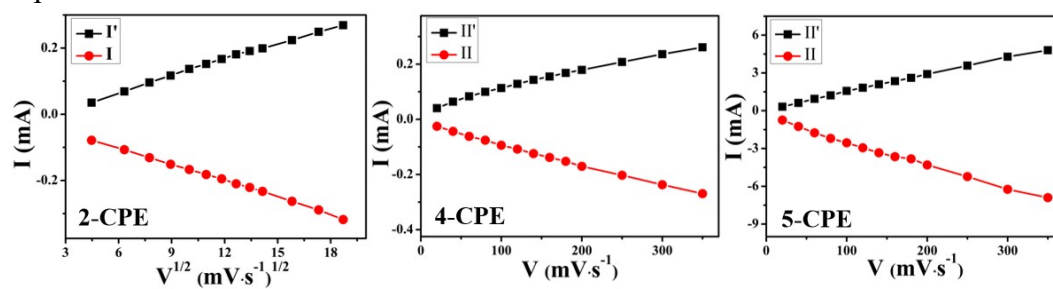

Fig. S5 The relationships between peak currents and scan rates of 2-, 4- and 5-CPEs.

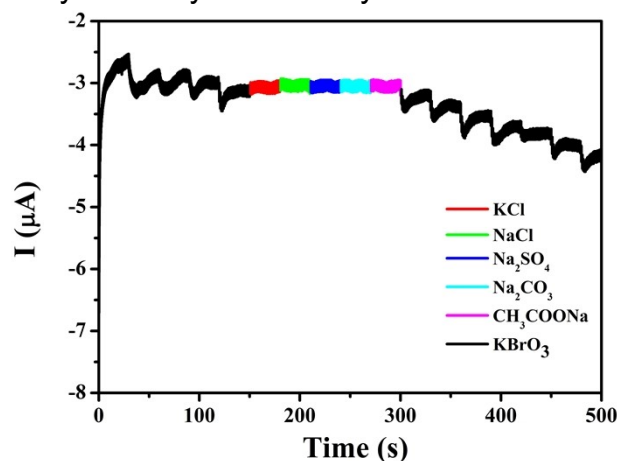

Fig. S6 Amperometric current response of 4-CPE to  $\text{BrO}_3^-$  in aqueous solution after the addition of various inorganic ions after 6 months.

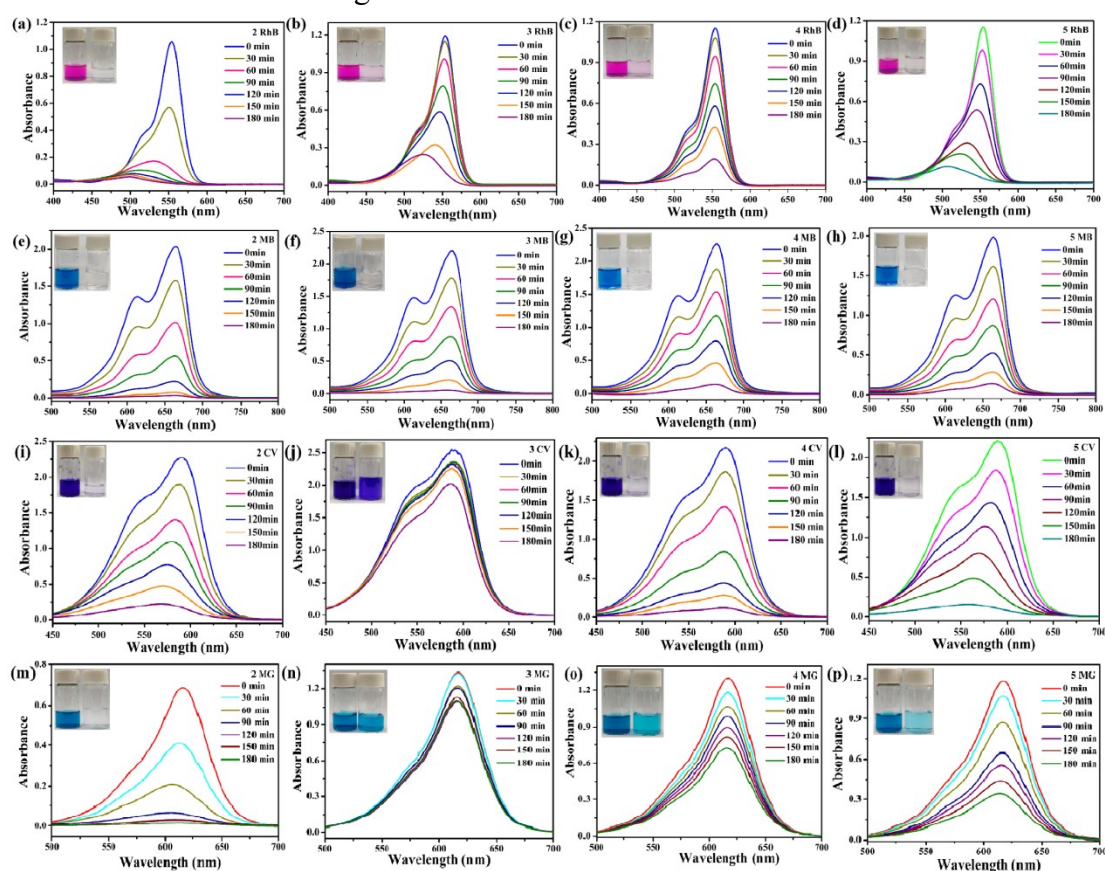

Fig. S7 Absorption spectra of RhB (a-d), MB (e-h), CV (i-h) and MG (m-p) solutions under 300 W Xe light with full spectrum in the presence of compounds 2-5.

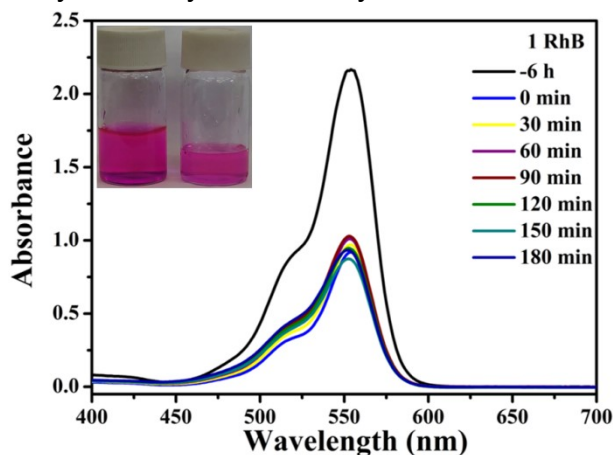

Fig. S8 Absorption spectra of RhB (40 ppm) after 6 h dark reaction in the presence of compound **1** under 300 W Xe light with full spectrum.

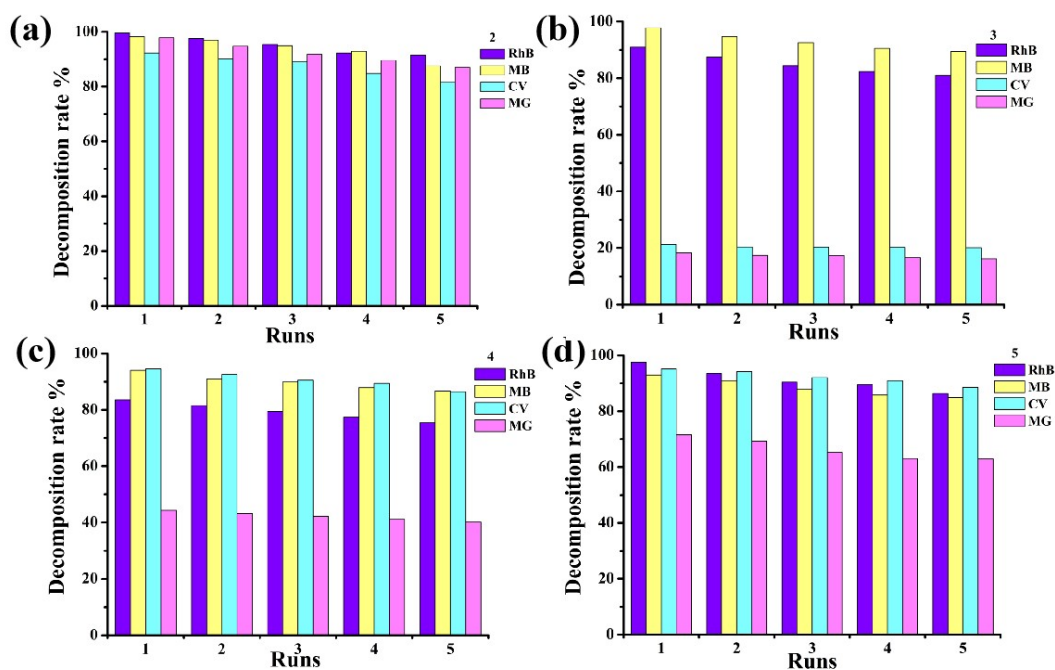

Fig. S9 Cycling experiments of compounds **2** (a), **3** (b), **4** (c) and **5** (d) on photolysis of RhB, MB, CV and MG.

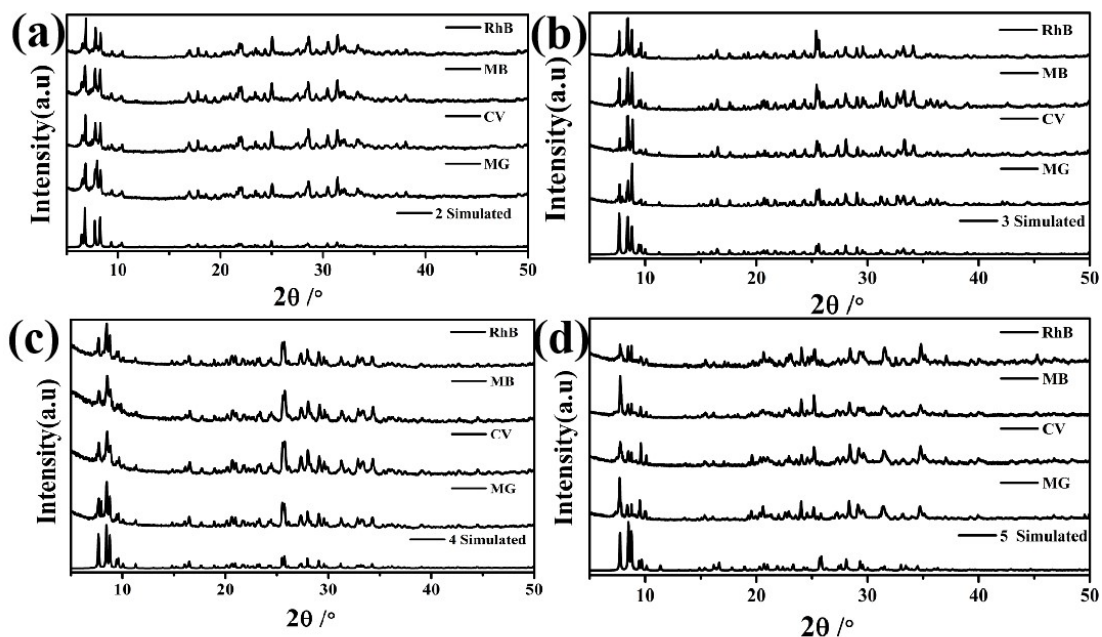

Fig. S10 XRD patterns of 2-5: the simulated XRD pattern of 2-5, experimental XRD pattern of 2-5 before and after photocatalytic degradation.

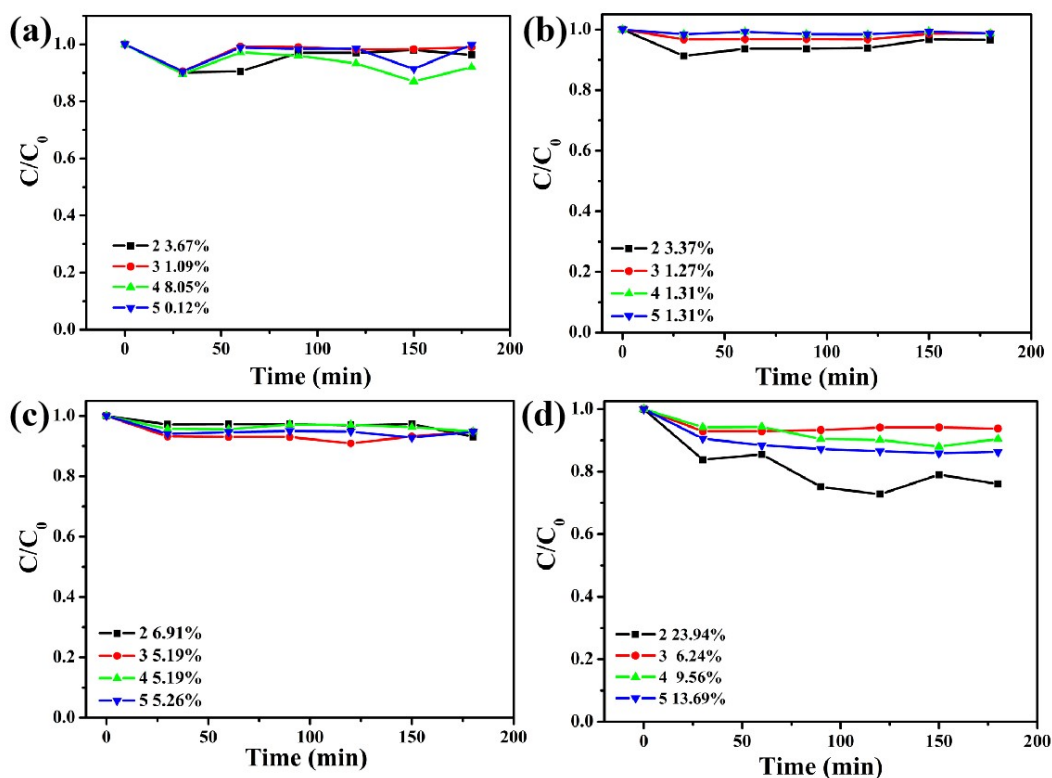

Fig. S11 Adsorption rate plots of RhB (a), MB (b), CV (c) and MG (d) solutions in the absence of light in the presence of compounds 2-5.

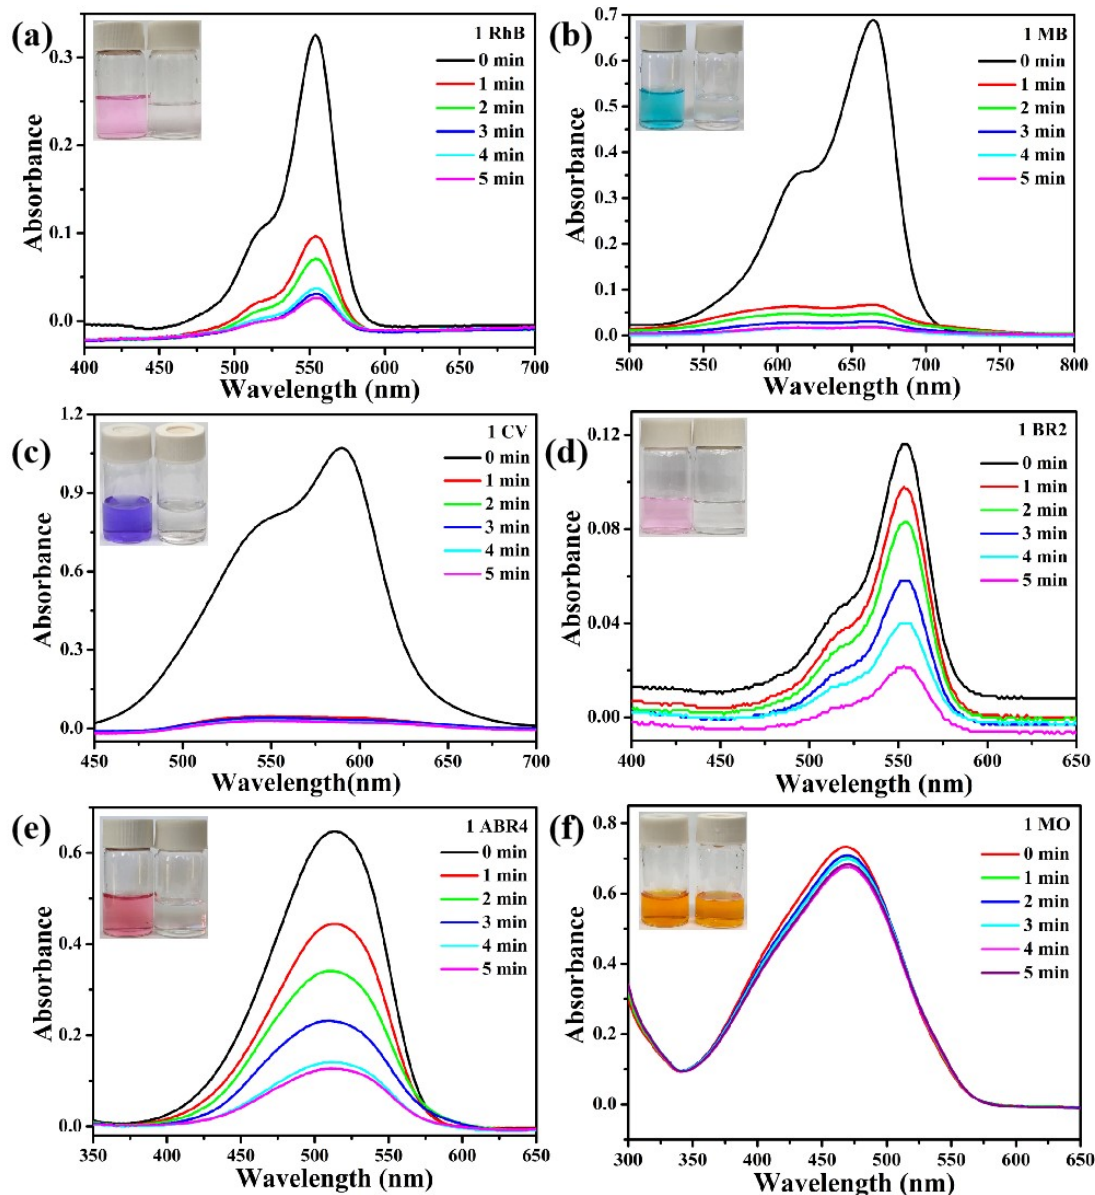

Fig. S12 Adsorption spectra of RhB (a), MB (b), CV (c), BR2(d), ABR4 (e) and MO (f) solutions during the adsorption in the presence of compound 1.

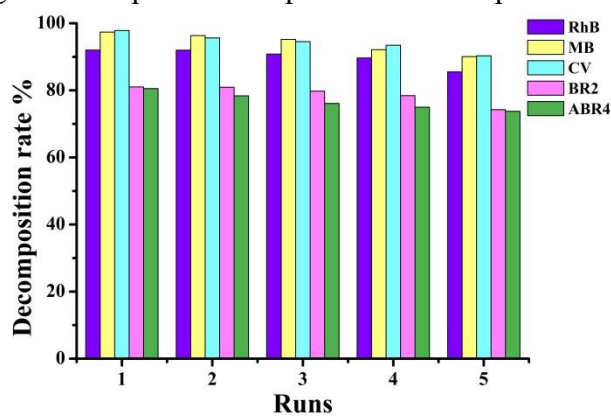

Fig. S13 Recyclability of RhB, MB, CV, BR2 and ABR4 adsorbed by compound 1.



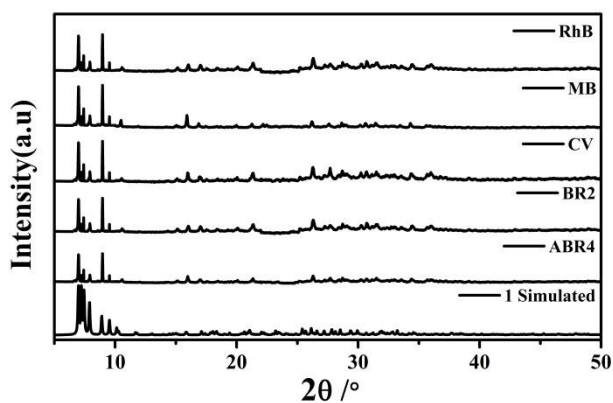

Fig. S14 XRD patterns of **1**: the simulated XRD pattern of **1**, experimental XRD pattern of **1** before and after adsorption.

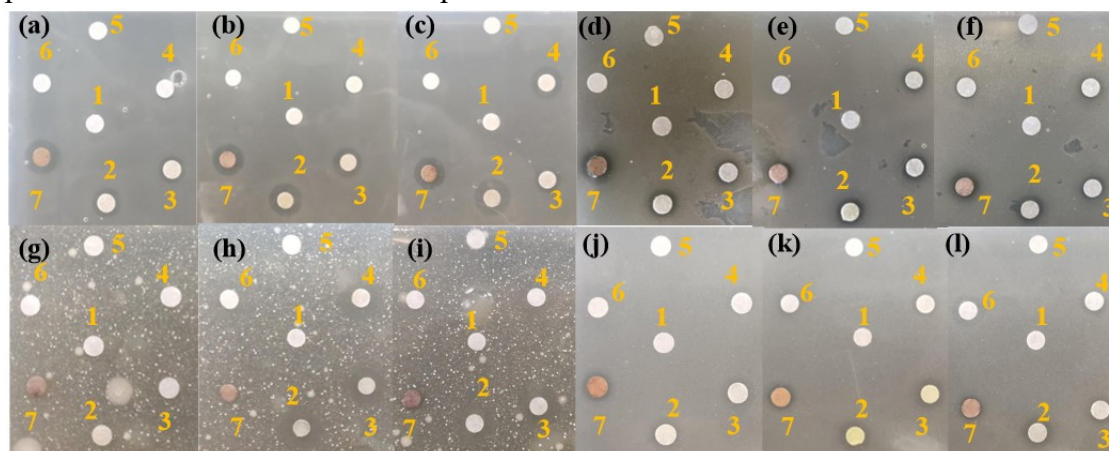

Fig. S15 The inhibition zones of antibacterial tests of **3** (a), **4** (b) and **5** (c) against *E. coli*; **3** (d), **4** (e) and **5** (f) against *R. solanacearum*; **3** (g), **4** (h) and **5** (i) against *B. subtilis*; **3** (j), **4** (k) and **5** (l) against *C. albicans*.

Table S1 The selected bond lengths (Å) and angles (°) of compounds **1-5**.

| <b>1</b>     |           |              |           |
|--------------|-----------|--------------|-----------|
| Co(1)-N(4)#1 | 2.070(14) | W(3)-O(20)   | 1.874(13) |
| Co(1)-N(1)   | 2.071(14) | W(3)-O(15)   | 1.921(14) |
| Co(1)-O(1W)  | 2.129(15) | W(3)-O(22)   | 1.927(14) |
| Co(1)-O(2)   | 2.165(13) | W(3)-O(5)    | 1.930(15) |
| Co(1)-O(2W)  | 2.168(15) | W(3)-O(17)   | 2.481(18) |
| Co(1)-O(1)   | 2.213(14) | W(3)-O(8)    | 2.49(2)   |
| P(1)-O(17)   | 1.498(19) | W(4)-O(25)   | 1.689(12) |
| P(1)-O(17)#2 | 1.498(19) | W(4)-O(6)    | 1.844(15) |
| P(1)-O(8)#2  | 1.51(2)   | W(4)-O(19)   | 1.884(14) |
| P(1)-O(8)    | 1.51(2)   | W(4)-O(13)#2 | 1.914(15) |
| P(1)-O(26)#2 | 1.519(19) | W(4)-O(12)#2 | 1.917(15) |
| P(1)-O(26)   | 1.519(19) | W(4)-O(9)    | 2.496(18) |
| P(1)-O(9)#2  | 1.554(18) | W(4)-O(26)#2 | 2.528(18) |
| P(1)-O(9)    | 1.554(18) | W(5)-O(21)   | 1.786(15) |

ElectronicSupplementaryMaterial(ESI)forCrystEngComm.  
Thisjournalis©TheRoyalSocietyofChemistry2022

|                      |            |                      |           |
|----------------------|------------|----------------------|-----------|
| W(1)-O(7)            | 1.677(12)  | W(5)-O(18B)          | 1.87(2)   |
| W(1)-O(18B)#2        | 1.83(2)    | W(5)-O(20)           | 1.904(13) |
| W(1)-O(15)           | 1.916(13)  | W(5)-O(6)            | 1.959(15) |
| W(1)-O(13)           | 1.920(15)  | W(5)-O(16B)          | 1.99(2)   |
| W(1)-O(18A)#2        | 1.94(2)    | W(5)-O(16A)          | 2.00(2)   |
| W(1)-O(11)           | 1.943(13)  | W(5)-O(18A)          | 2.15(2)   |
| W(1)-O(9)#2          | 2.434(18)  | W(5)-O(8)            | 2.45(2)   |
| W(1)-O(17)           | 2.526(18)  | W(5)-O(9)            | 2.470(18) |
| W(2)-O(23)           | 1.672(12)  | W(6)-O(10)           | 1.690(12) |
| W(2)-O(11)           | 1.855(13)  | W(6)-O(16B)          | 1.75(2)   |
| W(2)-O(5)            | 1.873(14)  | W(6)-O(22)           | 1.853(16) |
| W(2)-O(19)           | 1.894(14)  | W(6)-O(12)           | 1.902(16) |
| W(2)-O(14)#2         | 1.904(16)  | W(6)-O(14)           | 1.910(15) |
| W(2)-O(26)#2         | 2.463(19)  | W(6)-O(16A)          | 1.96(2)   |
| W(2)-O(17)           | 2.508(19)  | W(6)-O(26)           | 2.474(18) |
| W(3)-O(24)           | 1.704(13)  | W(6)-O(8)            | 2.48(2)   |
| N(4)#1-Co(1)-N(1)    | 100.1(6)   | O(20)-W(3)-O(5)      | 88.3(7)   |
| N(4)#1-Co(1)-O(1W)   | 88.1(6)    | O(15)-W(3)-O(5)      | 87.3(6)   |
| N(1)-Co(1)-O(1W)     | 89.1(6)    | O(22)-W(3)-O(5)      | 156.6(9)  |
| N(4)#1-Co(1)-O(2)    | 156.0(5)   | O(24)-W(3)-O(17)     | 158.7(7)  |
| N(1)-Co(1)-O(2)      | 103.8(6)   | O(20)-W(3)-O(17)     | 94.3(7)   |
| O(1W)-Co(1)-O(2)     | 94.4(5)    | O(15)-W(3)-O(17)     | 64.0(7)   |
| N(4)#1-Co(1)-O(2W)   | 93.8(7)    | O(22)-W(3)-O(17)     | 92.0(8)   |
| N(1)-Co(1)-O(2W)     | 90.3(6)    | O(5)-W(3)-O(17)      | 65.1(7)   |
| O(1W)-Co(1)-O(2W)    | 178.0(7)   | O(24)-W(3)-O(8)      | 161.0(7)  |
| O(2)-Co(1)-O(2W)     | 84.0(6)    | O(20)-W(3)-O(8)      | 65.8(7)   |
| N(4)#1-Co(1)-O(1)    | 96.9(5)    | O(15)-W(3)-O(8)      | 92.5(8)   |
| N(1)-Co(1)-O(1)      | 161.7(6)   | O(22)-W(3)-O(8)      | 64.7(8)   |
| O(1W)-Co(1)-O(1)     | 84.8(6)    | O(5)-W(3)-O(8)       | 92.9(8)   |
| O(2)-Co(1)-O(1)      | 59.6(5)    | O(17)-W(3)-O(8)      | 40.1(6)   |
| O(2W)-Co(1)-O(1)     | 95.2(6)    | O(25)-W(4)-O(6)      | 102.5(7)  |
| O(17)-P(1)-O(17)#2   | 179.999(3) | O(25)-W(4)-O(19)     | 103.4(7)  |
| O(17)-P(1)-O(8)#2    | 111.0(10)  | O(6)-W(4)-O(19)      | 89.0(7)   |
| O(17)#2-P(1)-O(8)#2  | 69.0(10)   | O(25)-W(4)-O(13)#2   | 100.6(7)  |
| O(17)-P(1)-O(8)      | 69.0(10)   | O(6)-W(4)-O(13)#2    | 88.8(7)   |
| O(17)#2-P(1)-O(8)    | 111.0(10)  | O(19)-W(4)-O(13)#2   | 155.9(7)  |
| O(8)#2-P(1)-O(8)     | 179.999(1) | O(25)-W(4)-O(12)#2   | 100.2(8)  |
| O(17)-P(1)-O(26)#2   | 69.9(10)   | O(6)-W(4)-O(12)#2    | 157.2(8)  |
| O(17)#2-P(1)-O(26)#2 | 110.1(10)  | O(19)-W(4)-O(12)#2   | 86.8(6)   |
| O(8)#2-P(1)-O(26)#2  | 71.9(10)   | O(13)#2-W(4)-O(12)#2 | 86.1(7)   |
| O(8)-P(1)-O(26)#2    | 108.1(10)  | O(25)-W(4)-O(9)      | 160.2(6)  |
| O(17)-P(1)-O(26)     | 110.1(10)  | O(6)-W(4)-O(9)       | 66.3(7)   |
| O(17)#2-P(1)-O(26)   | 69.9(10)   | O(19)-W(4)-O(9)      | 93.1(7)   |

ElectronicSupplementaryMaterial(ESI)forCrystEngComm.  
Thisjournalis©TheRoyalSocietyofChemistry2022

|                        |            |                      |           |
|------------------------|------------|----------------------|-----------|
| O(8)#2-P(1)-O(26)      | 108.1(10)  | O(13)#2-W(4)-O(9)    | 64.1(6)   |
| O(8)-P(1)-O(26)        | 71.9(10)   | O(12)#2-W(4)-O(9)    | 91.5(7)   |
| O(26)#2-P(1)-O(26)     | 179.999(3) | O(25)-W(4)-O(26)#2   | 157.3(7)  |
| O(17)-P(1)-O(9)#2      | 70.0(9)    | O(6)-W(4)-O(26)#2    | 95.4(7)   |
| O(17)#2-P(1)-O(9)#2    | 110.0(9)   | O(19)-W(4)-O(26)#2   | 62.6(7)   |
| O(8)#2-P(1)-O(9)#2     | 70.3(10)   | O(13)#2-W(4)-O(26)#2 | 93.7(6)   |
| O(8)-P(1)-O(9)#2       | 109.7(10)  | O(12)#2-W(4)-O(26)#2 | 62.9(7)   |
| O(26)#2-P(1)-O(9)#2    | 107.9(10)  | O(9)-W(4)-O(26)#2    | 42.2(6)   |
| O(26)-P(1)-O(9)#2      | 72.1(10)   | O(21)-W(5)-O(18B)    | 109.0(9)  |
| O(17)-P(1)-O(9)        | 110.0(9)   | O(21)-W(5)-O(20)     | 101.6(8)  |
| O(17)#2-P(1)-O(9)      | 70.0(9)    | O(18B)-W(5)-O(20)    | 149.0(9)  |
| O(8)#2-P(1)-O(9)       | 109.7(10)  | O(21)-W(5)-O(6)      | 100.5(8)  |
| O(8)-P(1)-O(9)         | 70.3(10)   | O(18B)-W(5)-O(6)     | 88.3(8)   |
| O(26)#2-P(1)-O(9)      | 72.1(10)   | O(20)-W(5)-O(6)      | 91.0(7)   |
| O(26)-P(1)-O(9)        | 107.9(10)  | O(21)-W(5)-O(16B)    | 107.9(10) |
| O(9)#2-P(1)-O(9)       | 179.999(2) | O(18B)-W(5)-O(16B)   | 75.1(11)  |
| O(7)-W(1)-O(18B)#2     | 111.7(10)  | O(20)-W(5)-O(16B)    | 91.2(8)   |
| O(7)-W(1)-O(15)        | 101.7(8)   | O(6)-W(5)-O(16B)     | 150.4(9)  |
| O(18B)#2-W(1)-O(15)    | 146.0(10)  | O(21)-W(5)-O(16A)    | 93.9(9)   |
| O(7)-W(1)-O(13)        | 103.6(7)   | O(18B)-W(5)-O(16A)   | 86.7(10)  |
| O(18B)#2-W(1)-O(13)    | 91.0(8)    | O(20)-W(5)-O(16A)    | 86.5(8)   |
| O(15)-W(1)-O(13)       | 87.1(6)    | O(6)-W(5)-O(16A)     | 165.6(9)  |
| O(7)-W(1)-O(18A)#2     | 91.5(9)    | O(16B)-W(5)-O(16A)   | 16.0(8)   |
| O(18B)#2-W(1)-O(18A)#2 | 21.2(7)    | O(21)-W(5)-O(18A)    | 91.4(9)   |
| O(15)-W(1)-O(18A)#2    | 166.7(9)   | O(18B)-W(5)-O(18A)   | 18.6(8)   |
| O(13)-W(1)-O(18A)#2    | 89.6(7)    | O(20)-W(5)-O(18A)    | 166.9(8)  |
| O(7)-W(1)-O(11)        | 101.4(7)   | O(6)-W(5)-O(18A)     | 85.4(7)   |
| O(18B)#2-W(1)-O(11)    | 81.4(8)    | O(16B)-W(5)-O(18A)   | 85.9(10)  |
| O(15)-W(1)-O(11)       | 86.2(5)    | O(16A)-W(5)-O(18A)   | 93.9(9)   |
| O(13)-W(1)-O(11)       | 155.0(7)   | O(21)-W(5)-O(8)      | 160.4(8)  |
| O(18A)#2-W(1)-O(11)    | 91.5(7)    | O(18B)-W(5)-O(8)     | 83.0(9)   |
| O(7)-W(1)-O(9)#2       | 161.6(7)   | O(20)-W(5)-O(8)      | 66.2(7)   |
| O(18B)#2-W(1)-O(9)#2   | 56.2(9)    | O(6)-W(5)-O(8)       | 95.1(7)   |
| O(15)-W(1)-O(9)#2      | 92.7(8)    | O(16B)-W(5)-O(8)     | 59.2(9)   |
| O(13)-W(1)-O(9)#2      | 65.5(6)    | O(16A)-W(5)-O(8)     | 70.9(8)   |
| O(18A)#2-W(1)-O(9)#2   | 74.3(8)    | O(18A)-W(5)-O(8)     | 101.5(8)  |
| O(11)-W(1)-O(9)#2      | 90.8(7)    | O(21)-W(5)-O(9)      | 157.3(8)  |
| O(7)-W(1)-O(17)        | 157.0(7)   | O(18B)-W(5)-O(9)     | 55.1(9)   |
| O(18B)#2-W(1)-O(17)    | 83.2(9)    | O(20)-W(5)-O(9)      | 96.7(7)   |
| O(15)-W(1)-O(17)       | 63.1(7)    | O(6)-W(5)-O(9)       | 65.6(6)   |
| O(13)-W(1)-O(17)       | 93.2(6)    | O(16B)-W(5)-O(9)     | 84.8(9)   |
| O(18A)#2-W(1)-O(17)    | 104.4(8)   | O(16A)-W(5)-O(9)     | 100.6(9)  |
| O(11)-W(1)-O(17)       | 62.3(6)    | O(18A)-W(5)-O(9)     | 70.3(7)   |

ElectronicSupplementaryMaterial(ESI)forCrystEngComm.  
Thisjournalis©TheRoyalSocietyofChemistry2022

|                      |           |                    |           |
|----------------------|-----------|--------------------|-----------|
| O(9)#2-W(1)-O(17)    | 41.3(6)   | O(8)-W(5)-O(9)     | 42.0(6)   |
| O(23)-W(2)-O(11)     | 103.0(7)  | O(10)-W(6)-O(16B)  | 108.3(10) |
| O(23)-W(2)-O(5)      | 101.9(9)  | O(10)-W(6)-O(22)   | 101.9(8)  |
| O(11)-W(2)-O(5)      | 88.8(6)   | O(16B)-W(6)-O(22)  | 93.7(9)   |
| O(23)-W(2)-O(19)     | 102.8(7)  | O(10)-W(6)-O(12)   | 100.0(7)  |
| O(11)-W(2)-O(19)     | 154.2(8)  | O(16B)-W(6)-O(12)  | 150.4(10) |
| O(5)-W(2)-O(19)      | 87.7(7)   | O(22)-W(6)-O(12)   | 88.5(7)   |
| O(23)-W(2)-O(14)#2   | 101.5(8)  | O(10)-W(6)-O(14)   | 100.3(8)  |
| O(11)-W(2)-O(14)#2   | 86.4(7)   | O(16B)-W(6)-O(14)  | 81.3(10)  |
| O(5)-W(2)-O(14)#2    | 156.6(9)  | O(22)-W(6)-O(14)   | 157.7(9)  |
| O(19)-W(2)-O(14)#2   | 86.7(7)   | O(12)-W(6)-O(14)   | 85.7(7)   |
| O(23)-W(2)-O(26)#2   | 159.0(7)  | O(10)-W(6)-O(16A)  | 95.5(9)   |
| O(11)-W(2)-O(26)#2   | 90.8(7)   | O(16B)-W(6)-O(16A) | 15.9(9)   |
| O(5)-W(2)-O(26)#2    | 94.1(8)   | O(22)-W(6)-O(16A)  | 87.2(8)   |
| O(19)-W(2)-O(26)#2   | 64.0(7)   | O(12)-W(6)-O(16A)  | 164.4(9)  |
| O(14)#2-W(2)-O(26)#2 | 63.1(7)   | O(14)-W(6)-O(16A)  | 92.7(9)   |
| O(23)-W(2)-O(17)     | 160.3(7)  | O(10)-W(6)-O(26)   | 156.5(7)  |
| O(11)-W(2)-O(17)     | 63.6(6)   | O(16B)-W(6)-O(26)  | 86.2(10)  |
| O(5)-W(2)-O(17)      | 65.2(7)   | O(22)-W(6)-O(26)   | 95.3(8)   |
| O(19)-W(2)-O(17)     | 91.9(7)   | O(12)-W(6)-O(26)   | 64.3(7)   |
| O(14)#2-W(2)-O(17)   | 92.3(7)   | O(14)-W(6)-O(26)   | 62.8(7)   |
| O(26)#2-W(2)-O(17)   | 40.7(6)   | O(16A)-W(6)-O(26)  | 101.3(9)  |
| O(24)-W(3)-O(20)     | 102.5(8)  | O(10)-W(6)-O(8)    | 161.4(7)  |
| O(24)-W(3)-O(15)     | 99.9(8)   | O(16B)-W(6)-O(8)   | 60.9(9)   |
| O(20)-W(3)-O(15)     | 157.6(8)  | O(22)-W(6)-O(8)    | 65.8(8)   |
| O(24)-W(3)-O(22)     | 101.4(9)  | O(12)-W(6)-O(8)    | 93.7(7)   |
| O(20)-W(3)-O(22)     | 88.4(6)   | O(14)-W(6)-O(8)    | 93.1(8)   |
| O(15)-W(3)-O(22)     | 87.0(7)   | O(16A)-W(6)-O(8)   | 70.9(8)   |
| O(24)-W(3)-O(5)      | 102.0(8)  | O(26)-W(6)-O(8)    | 42.1(6)   |
| 2                    |           |                    |           |
| Ni(1)-N(8)#1         | 2.06(2)   | W(4)-O(2)          | 2.40(3)   |
| Ni(1)-N(1)           | 2.06(2)   | W(4)-O(4)          | 2.41(3)   |
| Ni(1)-O(24)#2        | 2.09(2)   | W(5)-O(23)         | 1.63(2)   |
| Ni(1)-O(1W)          | 2.100(19) | W(5)-O(15)         | 1.86(4)   |
| Ni(1)-N(5)           | 2.10(2)   | W(5)-O(16)         | 1.88(3)   |
| Ni(1)-O(2W)          | 2.14(2)   | W(5)-O(5)          | 1.88(2)   |
| W(1)-O(9)            | 1.69(2)   | W(5)-O(11)         | 1.89(3)   |
| W(1)-O(13)           | 1.89(3)   | W(5)-O(1)          | 2.40(3)   |
| W(1)-O(10)           | 1.89(3)   | W(5)-O(2)          | 2.48(3)   |
| W(1)-O(7)            | 1.90(2)   | W(6)-O(18)         | 1.620(19) |
| W(1)-O(12)           | 1.92(3)   | W(6)-O(6)          | 1.87(4)   |
| W(1)-O(4)            | 2.44(3)   | W(6)-O(11)         | 1.88(3)   |
| W(1)-O(3)            | 2.44(4)   | W(6)-O(13)#2       | 1.91(3)   |

ElectronicSupplementaryMaterial(ESI)forCrystEngComm.  
Thisjournalis©TheRoyalSocietyofChemistry2022

|                      |           |                  |           |
|----------------------|-----------|------------------|-----------|
| W(2)-O(14)           | 1.66(2)   | W(6)-O(21)#2     | 1.93(3)   |
| W(2)-O(7)            | 1.84(2)   | W(6)-O(1)        | 2.40(3)   |
| W(2)-O(6)            | 1.88(4)   | W(6)-O(4)#2      | 2.48(3)   |
| W(2)-O(15)           | 1.89(4)   | W(7)-O(19)       | 1.64(3)   |
| W(2)-O(8)            | 1.94(2)   | W(7)-O(22)#2     | 1.90(3)   |
| W(2)-O(1)            | 2.39(3)   | W(7)-O(22)       | 1.90(3)   |
| W(2)-O(3)            | 2.49(4)   | W(7)-O(16)       | 1.93(3)   |
| W(3)-O(17)           | 1.67(3)   | W(7)-O(16)#2     | 1.93(3)   |
| W(3)-O(12)           | 1.89(2)   | W(7)-O(2)#2      | 2.44(3)   |
| W(3)-O(12)#2         | 1.89(2)   | W(7)-O(2)        | 2.44(3)   |
| W(3)-O(8)#2          | 1.89(2)   | P(1)-O(2)#2      | 1.53(4)   |
| W(3)-O(8)            | 1.89(2)   | P(1)-O(2)        | 1.53(4)   |
| W(3)-O(3)            | 2.39(4)   | P(1)-O(3)#2      | 1.54(4)   |
| W(3)-O(3)#2          | 2.39(4)   | P(1)-O(3)        | 1.54(4)   |
| W(4)-O(20)           | 1.66(2)   | P(1)-O(4)        | 1.54(3)   |
| W(4)-O(10)           | 1.87(2)   | P(1)-O(4)#2      | 1.54(3)   |
| W(4)-O(21)           | 1.89(2)   | P(1)-O(1)        | 1.63(3)   |
| W(4)-O(22)           | 1.90(3)   | P(1)-O(1)#2      | 1.63(3)   |
| W(4)-O(5)            | 1.908(18) |                  |           |
| N(8)#1-Ni(1)-N(1)    | 95.9(9)   | O(21)-W(4)-O(4)  | 67.5(11)  |
| N(8)#1-Ni(1)-O(24)#2 | 167.1(9)  | O(22)-W(4)-O(4)  | 96.0(13)  |
| N(1)-Ni(1)-O(24)#2   | 96.1(8)   | O(5)-W(4)-O(4)   | 92.3(10)  |
| N(8)#1-Ni(1)-O(1W)   | 90.7(8)   | O(2)-W(4)-O(4)   | 41.2(11)  |
| N(1)-Ni(1)-O(1W)     | 91.1(8)   | O(23)-W(5)-O(15) | 102.1(15) |
| O(24)#2-Ni(1)-O(1W)  | 93.9(7)   | O(23)-W(5)-O(16) | 99.9(14)  |
| N(8)#1-Ni(1)-N(5)    | 87.0(10)  | O(15)-W(5)-O(16) | 158.0(15) |
| N(1)-Ni(1)-N(5)      | 97.5(9)   | O(23)-W(5)-O(5)  | 101.6(10) |
| O(24)#2-Ni(1)-N(5)   | 86.7(9)   | O(15)-W(5)-O(5)  | 85.6(13)  |
| O(1W)-Ni(1)-N(5)     | 171.3(8)  | O(16)-W(5)-O(5)  | 89.2(11)  |
| N(8)#1-Ni(1)-O(2W)   | 87.1(10)  | O(23)-W(5)-O(11) | 101.8(13) |
| N(1)-Ni(1)-O(2W)     | 174.7(9)  | O(15)-W(5)-O(11) | 88.9(16)  |
| O(24)#2-Ni(1)-O(2W)  | 81.3(9)   | O(16)-W(5)-O(11) | 87.3(14)  |
| O(1W)-Ni(1)-O(2W)    | 84.5(8)   | O(5)-W(5)-O(11)  | 156.5(13) |
| N(5)-Ni(1)-O(2W)     | 87.0(9)   | O(23)-W(5)-O(1)  | 157.2(11) |
| O(9)-W(1)-O(13)      | 100.7(13) | O(15)-W(5)-O(1)  | 62.9(13)  |
| O(9)-W(1)-O(10)      | 102.9(14) | O(16)-W(5)-O(1)  | 96.3(12)  |
| O(13)-W(1)-O(10)     | 87.3(13)  | O(5)-W(5)-O(1)   | 94.4(9)   |
| O(9)-W(1)-O(7)       | 102.1(11) | O(11)-W(5)-O(1)  | 62.9(13)  |
| O(13)-W(1)-O(7)      | 157.1(13) | O(23)-W(5)-O(2)  | 158.0(12) |
| O(10)-W(1)-O(7)      | 88.1(11)  | O(15)-W(5)-O(2)  | 92.4(14)  |
| O(9)-W(1)-O(12)      | 98.7(13)  | O(16)-W(5)-O(2)  | 66.4(12)  |
| O(13)-W(1)-O(12)     | 90.7(13)  | O(5)-W(5)-O(2)   | 62.7(10)  |
| O(10)-W(1)-O(12)     | 158.4(15) | O(11)-W(5)-O(2)  | 94.8(13)  |

ElectronicSupplementaryMaterial(ESI)forCrystEngComm.  
Thisjournalis©TheRoyalSocietyofChemistry2022

|                     |           |                      |           |
|---------------------|-----------|----------------------|-----------|
| O(7)-W(1)-O(12)     | 85.5(10)  | O(1)-W(5)-O(2)       | 44.7(11)  |
| O(9)-W(1)-O(4)      | 160.3(12) | O(18)-W(6)-O(6)      | 103.9(14) |
| O(13)-W(1)-O(4)     | 65.8(13)  | O(18)-W(6)-O(11)     | 105.8(13) |
| O(10)-W(1)-O(4)     | 63.7(13)  | O(6)-W(6)-O(11)      | 88.0(16)  |
| O(7)-W(1)-O(4)      | 92.1(11)  | O(18)-W(6)-O(13)#2   | 96.7(12)  |
| O(12)-W(1)-O(4)     | 95.9(13)  | O(6)-W(6)-O(13)#2    | 87.8(16)  |
| O(9)-W(1)-O(3)      | 156.9(13) | O(11)-W(6)-O(13)#2   | 157.5(15) |
| O(13)-W(1)-O(3)     | 94.4(14)  | O(18)-W(6)-O(21)#2   | 99.0(11)  |
| O(10)-W(1)-O(3)     | 95.2(15)  | O(6)-W(6)-O(21)#2    | 156.9(14) |
| O(7)-W(1)-O(3)      | 63.8(12)  | O(11)-W(6)-O(21)#2   | 88.5(13)  |
| O(12)-W(1)-O(3)     | 63.5(13)  | O(13)#2-W(6)-O(21)#2 | 86.8(12)  |
| O(4)-W(1)-O(3)      | 42.8(12)  | O(18)-W(6)-O(1)      | 160.0(11) |
| O(14)-W(2)-O(7)     | 102.9(11) | O(6)-W(6)-O(1)       | 61.2(14)  |
| O(14)-W(2)-O(6)     | 102.4(14) | O(11)-W(6)-O(1)      | 62.8(12)  |
| O(7)-W(2)-O(6)      | 154.6(14) | O(13)#2-W(6)-O(1)    | 95.9(12)  |
| O(14)-W(2)-O(15)    | 102.4(13) | O(21)#2-W(6)-O(1)    | 97.2(10)  |
| O(7)-W(2)-O(15)     | 87.4(14)  | O(18)-W(6)-O(4)#2    | 155.3(11) |
| O(6)-W(2)-O(15)     | 88.6(17)  | O(6)-W(6)-O(4)#2     | 92.0(14)  |
| O(14)-W(2)-O(8)     | 99.8(10)  | O(11)-W(6)-O(4)#2    | 93.4(13)  |
| O(7)-W(2)-O(8)      | 88.9(10)  | O(13)#2-W(6)-O(4)#2  | 64.7(12)  |
| O(6)-W(2)-O(8)      | 85.5(14)  | O(21)#2-W(6)-O(4)#2  | 65.5(11)  |
| O(15)-W(2)-O(8)     | 157.8(13) | O(1)-W(6)-O(4)#2     | 44.4(11)  |
| O(14)-W(2)-O(1)     | 156.6(10) | O(19)-W(7)-O(22)#2   | 98.4(10)  |
| O(7)-W(2)-O(1)      | 94.8(11)  | O(19)-W(7)-O(22)     | 98.4(10)  |
| O(6)-W(2)-O(1)      | 61.3(14)  | O(22)#2-W(7)-O(22)   | 163(2)    |
| O(15)-W(2)-O(1)     | 62.8(13)  | O(19)-W(7)-O(16)     | 99.5(10)  |
| O(8)-W(2)-O(1)      | 95.8(10)  | O(22)#2-W(7)-O(16)   | 89.1(14)  |
| O(14)-W(2)-O(3)     | 158.0(12) | O(22)-W(7)-O(16)     | 88.1(13)  |
| O(7)-W(2)-O(3)      | 63.3(12)  | O(19)-W(7)-O(16)#2   | 99.5(10)  |
| O(6)-W(2)-O(3)      | 92.1(15)  | O(22)#2-W(7)-O(16)#2 | 88.1(13)  |
| O(15)-W(2)-O(3)     | 94.3(15)  | O(22)-W(7)-O(16)#2   | 89.1(14)  |
| O(8)-W(2)-O(3)      | 64.6(12)  | O(16)-W(7)-O(16)#2   | 160.9(19) |
| O(1)-W(2)-O(3)      | 45.4(12)  | O(19)-W(7)-O(2)#2    | 158.2(8)  |
| O(17)-W(3)-O(12)    | 99.9(12)  | O(22)#2-W(7)-O(2)#2  | 65.5(13)  |
| O(17)-W(3)-O(12)#2  | 99.9(12)  | O(22)-W(7)-O(2)#2    | 98.2(13)  |
| O(12)-W(3)-O(12)#2  | 160(2)    | O(16)-W(7)-O(2)#2    | 95.0(13)  |
| O(17)-W(3)-O(8)#2   | 99.7(8)   | O(16)#2-W(7)-O(2)#2  | 66.8(12)  |
| O(12)-W(3)-O(8)#2   | 87.9(11)  | O(19)-W(7)-O(2)      | 158.2(8)  |
| O(12)#2-W(3)-O(8)#2 | 88.8(10)  | O(22)#2-W(7)-O(2)    | 98.2(13)  |
| O(17)-W(3)-O(8)     | 99.7(8)   | O(22)-W(7)-O(2)      | 65.5(13)  |
| O(12)-W(3)-O(8)     | 88.8(10)  | O(16)-W(7)-O(2)      | 66.8(12)  |
| O(12)#2-W(3)-O(8)   | 87.9(11)  | O(16)#2-W(7)-O(2)    | 95.0(13)  |
| O(8)#2-W(3)-O(8)    | 160.5(15) | O(2)#2-W(7)-O(2)     | 43.6(16)  |

ElectronicSupplementaryMaterial(ESI)forCrystEngComm.  
Thisjournalis©TheRoyalSocietyofChemistry2022

|                     |           |                    |           |
|---------------------|-----------|--------------------|-----------|
| O(17)-W(3)-O(3)     | 159.4(9)  | O(2)#2-P(1)-O(2)   | 73(3)     |
| O(12)-W(3)-O(3)     | 65.0(14)  | O(2)#2-P(1)-O(3)#2 | 111(2)    |
| O(12)#2-W(3)-O(3)   | 95.8(15)  | O(2)-P(1)-O(3)#2   | 177(2)    |
| O(8)#2-W(3)-O(3)    | 93.9(12)  | O(2)#2-P(1)-O(3)   | 177(2)    |
| O(8)-W(3)-O(3)      | 67.4(12)  | O(2)-P(1)-O(3)     | 111(2)    |
| O(17)-W(3)-O(3)#2   | 159.4(9)  | O(3)#2-P(1)-O(3)   | 66(3)     |
| O(12)-W(3)-O(3)#2   | 95.7(15)  | O(2)#2-P(1)-O(4)   | 111.6(18) |
| O(12)#2-W(3)-O(3)#2 | 65.0(14)  | O(2)-P(1)-O(4)     | 66.9(17)  |
| O(8)#2-W(3)-O(3)#2  | 67.4(12)  | O(3)#2-P(1)-O(4)   | 111(2)    |
| O(8)-W(3)-O(3)#2    | 93.9(12)  | O(3)-P(1)-O(4)     | 70.6(19)  |
| O(3)-W(3)-O(3)#2    | 41.2(19)  | O(2)#2-P(1)-O(4)#2 | 66.9(17)  |
| O(20)-W(4)-O(10)    | 101.9(17) | O(2)-P(1)-O(4)#2   | 111.6(18) |
| O(20)-W(4)-O(21)    | 98.9(12)  | O(3)#2-P(1)-O(4)#2 | 70.6(19)  |
| O(10)-W(4)-O(21)    | 88.7(11)  | O(3)-P(1)-O(4)#2   | 111(2)    |
| O(20)-W(4)-O(22)    | 98.6(15)  | O(4)-P(1)-O(4)#2   | 178(3)    |
| O(10)-W(4)-O(22)    | 159.4(16) | O(2)#2-P(1)-O(1)   | 107.9(17) |
| O(21)-W(4)-O(22)    | 89.7(12)  | O(2)-P(1)-O(1)     | 72.1(16)  |
| O(20)-W(4)-O(5)     | 101.8(11) | O(3)#2-P(1)-O(1)   | 107.0(19) |
| O(10)-W(4)-O(5)     | 86.4(10)  | O(3)-P(1)-O(1)     | 73.0(18)  |
| O(21)-W(4)-O(5)     | 159.3(10) | O(4)-P(1)-O(1)     | 108.6(17) |
| O(22)-W(4)-O(5)     | 87.9(11)  | O(4)#2-P(1)-O(1)   | 71.4(17)  |
| O(20)-W(4)-O(2)     | 158.8(14) | O(2)#2-P(1)-O(1)#2 | 72.1(16)  |
| O(10)-W(4)-O(2)     | 93.5(15)  | O(2)-P(1)-O(1)#2   | 107.9(17) |
| O(21)-W(4)-O(2)     | 95.9(11)  | O(3)#2-P(1)-O(1)#2 | 73.0(18)  |
| O(22)-W(4)-O(2)     | 66.3(13)  | O(3)-P(1)-O(1)#2   | 107.0(19) |
| O(5)-W(4)-O(2)      | 64.3(10)  | O(4)-P(1)-O(1)#2   | 71.4(17)  |
| O(20)-W(4)-O(4)     | 160.0(14) | O(4)#2-P(1)-O(1)#2 | 108.6(17) |
| O(10)-W(4)-O(4)     | 64.5(14)  | O(1)-P(1)-O(1)#2   | 180(3)    |
| <b>3</b>            |           |                    |           |
| Ag(1)-N(1)          | 2.136(9)  | W(6)-O(23)         | 1.907(7)  |
| Ag(1)-N(5)          | 2.149(9)  | W(6)-O(40)         | 1.911(7)  |
| Ag(1)-O(35)         | 2.857(7)  | W(6)-O(34)         | 1.915(7)  |
| Ag(1)-O(32)         | 3.052(7)  | W(6)-O(36)         | 2.438(7)  |
| P(1)-O(36)          | 1.532(8)  | W(7)-O(24)         | 1.676(7)  |
| P(1)-O(4)           | 1.532(7)  | W(7)-O(25)         | 1.883(8)  |
| P(1)-O(3)           | 1.540(7)  | W(7)-O(12)         | 1.910(7)  |
| P(1)-O(2)           | 1.542(7)  | W(7)-O(27)         | 1.931(7)  |
| W(1)-O(5)           | 1.705(7)  | W(7)-O(26)         | 1.935(7)  |
| W(1)-O(6)           | 1.899(7)  | W(7)-O(36)         | 2.445(7)  |
| W(1)-O(8)           | 1.901(7)  | W(8)-O(28)         | 1.680(7)  |
| W(1)-O(9)           | 1.907(8)  | W(8)-O(29)         | 1.907(8)  |
| W(1)-O(7)           | 1.909(8)  | W(8)-O(25)         | 1.910(8)  |

ElectronicSupplementaryMaterial(ESI)forCrystEngComm.  
Thisjournalis©TheRoyalSocietyofChemistry2022

|                   |          |                  |          |
|-------------------|----------|------------------|----------|
| W(1)-O(4)         | 2.431(7) | W(8)-O(15)       | 1.918(7) |
| W(2)-O(14)        | 1.693(7) | W(8)-O(30)       | 1.929(7) |
| W(2)-O(13)        | 1.885(8) | W(8)-O(3)        | 2.443(7) |
| W(2)-O(7)         | 1.906(8) | W(9)-O(31)       | 1.686(8) |
| W(2)-O(15)        | 1.910(7) | W(9)-O(19)       | 1.901(8) |
| W(2)-O(16)        | 1.924(8) | W(9)-O(1)        | 1.910(7) |
| W(2)-O(3)         | 2.432(6) | W(9)-O(16)       | 1.910(8) |
| W(3)-O(10)        | 1.686(8) | W(9)-O(29)       | 1.931(7) |
| W(3)-O(12)        | 1.910(7) | W(9)-O(3)        | 2.439(7) |
| W(3)-O(6)         | 1.911(7) | W(10)-O(33)      | 1.698(7) |
| W(3)-O(34)        | 1.913(8) | W(10)-O(22)      | 1.896(7) |
| W(3)-O(13)        | 1.921(8) | W(10)-O(40)      | 1.903(7) |
| W(3)-O(36)        | 2.439(7) | W(10)-O(37)      | 1.904(8) |
| W(4)-O(17)        | 1.681(8) | W(10)-O(38)      | 1.934(7) |
| W(4)-O(20)        | 1.897(7) | W(10)-O(2)       | 2.447(7) |
| W(4)-O(19)        | 1.901(8) | W(11)-O(32)      | 1.695(7) |
| W(4)-O(18)        | 1.918(7) | W(11)-O(26)      | 1.869(7) |
| W(4)-O(8)         | 1.923(7) | W(11)-O(30)      | 1.896(7) |
| W(4)-O(4)         | 2.431(7) | W(11)-O(38)      | 1.921(7) |
| W(5)-O(21)        | 1.681(8) | W(11)-O(35)      | 1.940(7) |
| W(5)-O(23)        | 1.905(7) | W(11)-O(2)       | 2.398(7) |
| W(5)-O(22)        | 1.907(7) | W(12)-O(11)      | 1.686(8) |
| W(5)-O(18)        | 1.915(8) | W(12)-O(1)       | 1.896(7) |
| W(5)-O(9)         | 1.928(7) | W(12)-O(20)      | 1.899(8) |
| W(5)-O(4)         | 2.454(7) | W(12)-O(35)      | 1.921(7) |
| W(6)-O(39)        | 1.689(8) | W(12)-O(37)      | 1.937(8) |
| W(6)-O(27)        | 1.907(7) | W(12)-O(2)       | 2.455(7) |
| N(1)-Ag(1)-N(5)   | 178.8(4) | O(40)-W(6)-O(34) | 155.5(3) |
| N(1)-Ag(1)-O(35)  | 86.1(3)  | O(39)-W(6)-O(36) | 170.2(3) |
| N(5)-Ag(1)-O(35)  | 92.8(3)  | O(27)-W(6)-O(36) | 71.7(3)  |
| N(1)-Ag(1)-O(32)  | 99.0(3)  | O(23)-W(6)-O(36) | 83.7(3)  |
| N(5)-Ag(1)-O(32)  | 80.7(3)  | O(40)-W(6)-O(36) | 84.0(3)  |
| O(35)-Ag(1)-O(32) | 55.3(2)  | O(34)-W(6)-O(36) | 71.9(3)  |
| O(36)-P(1)-O(4)   | 109.7(4) | O(24)-W(7)-O(25) | 103.5(4) |
| O(36)-P(1)-O(3)   | 109.5(4) | O(24)-W(7)-O(12) | 102.2(4) |
| O(4)-P(1)-O(3)    | 109.6(4) | O(25)-W(7)-O(12) | 89.7(3)  |
| O(36)-P(1)-O(2)   | 109.1(4) | O(24)-W(7)-O(27) | 101.3(4) |
| O(4)-P(1)-O(2)    | 109.7(4) | O(25)-W(7)-O(27) | 155.1(3) |
| O(3)-P(1)-O(2)    | 109.3(4) | O(12)-W(7)-O(27) | 87.7(3)  |
| O(5)-W(1)-O(6)    | 101.7(3) | O(24)-W(7)-O(26) | 102.8(3) |
| O(5)-W(1)-O(8)    | 103.2(3) | O(25)-W(7)-O(26) | 86.3(3)  |



ElectronicSupplementaryMaterial(ESI)forCrystEngComm.  
Thisjournalis©TheRoyalSocietyofChemistry2022

|                  |          |                   |          |
|------------------|----------|-------------------|----------|
| O(6)-W(1)-O(8)   | 155.1(3) | O(12)-W(7)-O(26)  | 154.9(3) |
| O(5)-W(1)-O(9)   | 99.5(3)  | O(27)-W(7)-O(26)  | 85.7(3)  |
| O(6)-W(1)-O(9)   | 88.0(3)  | O(24)-W(7)-O(36)  | 170.3(3) |
| O(8)-W(1)-O(9)   | 87.4(3)  | O(25)-W(7)-O(36)  | 84.5(3)  |
| O(5)-W(1)-O(7)   | 103.9(3) | O(12)-W(7)-O(36)  | 72.1(3)  |
| O(6)-W(1)-O(7)   | 85.5(3)  | O(27)-W(7)-O(36)  | 71.1(3)  |
| O(8)-W(1)-O(7)   | 89.0(3)  | O(26)-W(7)-O(36)  | 82.9(3)  |
| O(9)-W(1)-O(7)   | 156.5(3) | O(28)-W(8)-O(29)  | 101.7(4) |
| O(5)-W(1)-O(4)   | 170.3(3) | O(28)-W(8)-O(25)  | 103.1(4) |
| O(6)-W(1)-O(4)   | 83.1(3)  | O(29)-W(8)-O(25)  | 155.2(3) |
| O(8)-W(1)-O(4)   | 72.2(3)  | O(28)-W(8)-O(15)  | 102.3(3) |
| O(9)-W(1)-O(4)   | 72.0(3)  | O(29)-W(8)-O(15)  | 88.4(3)  |
| O(7)-W(1)-O(4)   | 84.8(3)  | O(25)-W(8)-O(15)  | 88.1(3)  |
| O(14)-W(2)-O(13) | 103.4(4) | O(28)-W(8)-O(30)  | 102.6(3) |
| O(14)-W(2)-O(7)  | 102.7(3) | O(29)-W(8)-O(30)  | 88.1(3)  |
| O(13)-W(2)-O(7)  | 86.2(3)  | O(25)-W(8)-O(30)  | 84.8(3)  |
| O(14)-W(2)-O(15) | 100.5(3) | O(15)-W(8)-O(30)  | 155.0(3) |
| O(13)-W(2)-O(15) | 88.8(3)  | O(28)-W(8)-O(3)   | 171.3(3) |
| O(7)-W(2)-O(15)  | 156.8(3) | O(29)-W(8)-O(3)   | 71.9(3)  |
| O(14)-W(2)-O(16) | 101.4(4) | O(25)-W(8)-O(3)   | 83.7(3)  |
| O(13)-W(2)-O(16) | 155.2(3) | O(15)-W(8)-O(3)   | 72.1(3)  |
| O(7)-W(2)-O(16)  | 87.9(3)  | O(30)-W(8)-O(3)   | 83.3(3)  |
| O(15)-W(2)-O(16) | 87.2(3)  | O(31)-W(9)-O(19)  | 103.4(4) |
| O(14)-W(2)-O(3)  | 169.7(3) | O(31)-W(9)-O(1)   | 103.2(4) |
| O(13)-W(2)-O(3)  | 84.2(3)  | O(19)-W(9)-O(1)   | 85.1(3)  |
| O(7)-W(2)-O(3)   | 84.5(3)  | O(31)-W(9)-O(16)  | 101.5(4) |
| O(15)-W(2)-O(3)  | 72.4(3)  | O(19)-W(9)-O(16)  | 89.0(3)  |
| O(16)-W(2)-O(3)  | 71.2(3)  | O(1)-W(9)-O(16)   | 155.3(3) |
| O(10)-W(3)-O(12) | 102.4(4) | O(31)-W(9)-O(29)  | 101.7(4) |
| O(10)-W(3)-O(6)  | 103.0(4) | O(19)-W(9)-O(29)  | 155.0(3) |
| O(12)-W(3)-O(6)  | 154.5(3) | O(1)-W(9)-O(29)   | 88.2(3)  |
| O(10)-W(3)-O(34) | 101.9(4) | O(16)-W(9)-O(29)  | 87.1(3)  |
| O(12)-W(3)-O(34) | 88.0(3)  | O(31)-W(9)-O(3)   | 170.1(3) |
| O(6)-W(3)-O(34)  | 88.6(3)  | O(19)-W(9)-O(3)   | 83.7(3)  |
| O(10)-W(3)-O(13) | 103.2(4) | O(1)-W(9)-O(3)    | 84.2(3)  |
| O(12)-W(3)-O(13) | 87.3(3)  | O(16)-W(9)-O(3)   | 71.3(3)  |
| O(6)-W(3)-O(13)  | 85.1(3)  | O(29)-W(9)-O(3)   | 71.6(3)  |
| O(34)-W(3)-O(13) | 154.8(3) | O(33)-W(10)-O(22) | 102.7(3) |
| O(10)-W(3)-O(36) | 171.6(3) | O(33)-W(10)-O(40) | 103.1(4) |
| O(12)-W(3)-O(36) | 72.2(3)  | O(22)-W(10)-O(40) | 86.2(3)  |
| O(6)-W(3)-O(36)  | 82.7(3)  | O(33)-W(10)-O(37) | 101.5(4) |

ElectronicSupplementaryMaterial(ESI)forCrystEngComm.  
Thisjournalis©TheRoyalSocietyofChemistry2022

|                  |          |                   |          |
|------------------|----------|-------------------|----------|
| O(34)-W(3)-O(36) | 71.9(3)  | O(22)-W(10)-O(37) | 89.9(3)  |
| O(13)-W(3)-O(36) | 83.2(3)  | O(40)-W(10)-O(37) | 155.4(3) |
| O(17)-W(4)-O(20) | 102.7(4) | O(33)-W(10)-O(38) | 100.3(3) |
| O(17)-W(4)-O(19) | 102.2(4) | O(22)-W(10)-O(38) | 156.9(3) |
| O(20)-W(4)-O(19) | 85.7(3)  | O(40)-W(10)-O(38) | 87.3(3)  |
| O(17)-W(4)-O(18) | 102.6(4) | O(37)-W(10)-O(38) | 86.9(3)  |
| O(20)-W(4)-O(18) | 88.8(3)  | O(33)-W(10)-O(2)  | 169.8(3) |
| O(19)-W(4)-O(18) | 155.2(3) | O(22)-W(10)-O(2)  | 85.7(3)  |
| O(17)-W(4)-O(8)  | 101.3(4) | O(40)-W(10)-O(2)  | 83.0(3)  |
| O(20)-W(4)-O(8)  | 156.0(3) | O(37)-W(10)-O(2)  | 72.5(3)  |
| O(19)-W(4)-O(8)  | 88.0(3)  | O(38)-W(10)-O(2)  | 71.6(3)  |
| O(18)-W(4)-O(8)  | 87.4(3)  | O(32)-W(11)-O(26) | 105.1(3) |
| O(17)-W(4)-O(4)  | 171.0(3) | O(32)-W(11)-O(30) | 101.6(3) |
| O(20)-W(4)-O(4)  | 84.4(3)  | O(26)-W(11)-O(30) | 87.0(3)  |
| O(19)-W(4)-O(4)  | 83.6(3)  | O(32)-W(11)-O(38) | 100.7(3) |
| O(18)-W(4)-O(4)  | 71.7(3)  | O(26)-W(11)-O(38) | 89.3(3)  |
| O(8)-W(4)-O(4)   | 71.9(3)  | O(30)-W(11)-O(38) | 157.6(3) |
| O(21)-W(5)-O(23) | 103.6(4) | O(32)-W(11)-O(35) | 97.9(3)  |
| O(21)-W(5)-O(22) | 102.3(4) | O(26)-W(11)-O(35) | 157.0(3) |
| O(23)-W(5)-O(22) | 86.5(3)  | O(30)-W(11)-O(35) | 88.3(3)  |
| O(21)-W(5)-O(18) | 101.6(4) | O(38)-W(11)-O(35) | 86.6(3)  |
| O(23)-W(5)-O(18) | 154.8(3) | O(32)-W(11)-O(2)  | 168.4(3) |
| O(22)-W(5)-O(18) | 88.1(3)  | O(26)-W(11)-O(2)  | 84.8(3)  |
| O(21)-W(5)-O(9)  | 101.8(4) | O(30)-W(11)-O(2)  | 84.7(3)  |
| O(23)-W(5)-O(9)  | 88.8(3)  | O(38)-W(11)-O(2)  | 72.9(3)  |
| O(22)-W(5)-O(9)  | 155.9(3) | O(35)-W(11)-O(2)  | 72.4(3)  |
| O(18)-W(5)-O(9)  | 86.2(3)  | O(11)-W(12)-O(1)  | 103.4(4) |
| O(21)-W(5)-O(4)  | 169.9(3) | O(11)-W(12)-O(20) | 103.5(4) |
| O(23)-W(5)-O(4)  | 83.8(3)  | O(1)-W(12)-O(20)  | 86.1(3)  |
| O(22)-W(5)-O(4)  | 84.9(3)  | O(11)-W(12)-O(35) | 101.0(4) |
| O(18)-W(5)-O(4)  | 71.3(3)  | O(1)-W(12)-O(35)  | 89.1(3)  |
| O(9)-W(5)-O(4)   | 71.1(3)  | O(20)-W(12)-O(35) | 155.5(3) |
| O(39)-W(6)-O(27) | 100.8(4) | O(11)-W(12)-O(37) | 100.7(4) |
| O(39)-W(6)-O(23) | 104.0(4) | O(1)-W(12)-O(37)  | 155.9(3) |
| O(27)-W(6)-O(23) | 155.2(3) | O(20)-W(12)-O(37) | 88.5(3)  |
| O(39)-W(6)-O(40) | 102.4(4) | O(35)-W(12)-O(37) | 86.2(3)  |
| O(27)-W(6)-O(40) | 88.8(3)  | O(11)-W(12)-O(2)  | 169.2(3) |
| O(23)-W(6)-O(40) | 85.5(3)  | O(1)-W(12)-O(2)   | 84.3(3)  |
| O(39)-W(6)-O(34) | 102.1(4) | O(20)-W(12)-O(2)  | 84.3(3)  |
| O(27)-W(6)-O(34) | 87.7(3)  | O(35)-W(12)-O(2)  | 71.3(3)  |
| O(23)-W(6)-O(34) | 87.6(3)  | O(37)-W(12)-O(2)  | 71.8(3)  |

| 4           |          |              |          |
|-------------|----------|--------------|----------|
| Ag(1)-N(1)  | 2.127(5) | Mo(6)-O(32)  | 1.862(4) |
| Ag(1)-N(5)  | 2.132(5) | Mo(6)-O(28)  | 1.979(4) |
| Ag(1)-O(35) | 2.853(4) | Mo(6)-O(31)  | 1.990(4) |
| Ag(1)-O(12) | 3.114(4) | Mo(6)-O(2)   | 2.451(3) |
| P(1)-O(4)   | 1.526(4) | Mo(7)-O(26)  | 1.681(4) |
| P(1)-O(2)   | 1.529(3) | Mo(7)-O(24)  | 1.847(4) |
| P(1)-O(1)   | 1.535(3) | Mo(7)-O(6)   | 1.855(4) |
| P(1)-O(3)   | 1.540(3) | Mo(7)-O(38)  | 1.980(4) |
| Mo(1)-O(10) | 1.687(3) | Mo(7)-O(34)  | 1.986(4) |
| Mo(1)-O(13) | 1.862(4) | Mo(7)-O(4)   | 2.447(3) |
| Mo(1)-O(25) | 1.886(4) | Mo(8)-O(11)  | 1.672(4) |
| Mo(1)-O(22) | 1.933(4) | Mo(8)-O(31)  | 1.846(4) |
| Mo(1)-O(7)  | 1.958(4) | Mo(8)-O(29)  | 1.909(3) |
| Mo(1)-O(1)  | 2.416(3) | Mo(8)-O(9)   | 1.920(4) |
| Mo(2)-O(23) | 1.678(4) | Mo(8)-O(20)  | 1.978(4) |
| Mo(2)-O(40) | 1.834(4) | Mo(8)-O(2)   | 2.440(3) |
| Mo(2)-O(9)  | 1.907(4) | Mo(9)-O(21)  | 1.668(4) |
| Mo(2)-O(25) | 1.945(4) | Mo(9)-O(20)  | 1.839(4) |
| Mo(2)-O(32) | 1.986(4) | Mo(9)-O(5)   | 1.870(4) |
| Mo(2)-O(2)  | 2.422(3) | Mo(9)-O(18)  | 1.981(4) |
| Mo(3)-O(14) | 1.674(4) | Mo(9)-O(6)   | 1.983(4) |
| Mo(3)-O(34) | 1.861(4) | Mo(9)-O(4)   | 2.430(3) |
| Mo(3)-O(7)  | 1.866(4) | Mo(10)-O(16) | 1.673(4) |
| Mo(3)-O(5)  | 1.960(4) | Mo(10)-O(28) | 1.850(4) |
| Mo(3)-O(40) | 1.990(4) | Mo(10)-O(35) | 1.875(4) |
| Mo(3)-O(4)  | 2.438(3) | Mo(10)-O(8)  | 1.950(4) |
| Mo(4)-O(17) | 1.669(4) | Mo(10)-O(27) | 2.008(4) |
| Mo(4)-O(8)  | 1.852(4) | Mo(10)-O(3)  | 2.456(3) |
| Mo(4)-O(36) | 1.867(4) | Mo(11)-O(15) | 1.681(4) |
| Mo(4)-O(13) | 1.972(4) | Mo(11)-O(27) | 1.845(4) |
| Mo(4)-O(37) | 1.984(4) | Mo(11)-O(39) | 1.879(4) |
| Mo(4)-O(1)  | 2.424(3) | Mo(11)-O(30) | 1.951(3) |
| Mo(5)-O(19) | 1.676(4) | Mo(11)-O(24) | 1.981(4) |
| Mo(5)-O(38) | 1.846(4) | Mo(11)-O(3)  | 2.447(3) |
| Mo(5)-O(22) | 1.907(4) | Mo(12)-O(12) | 1.688(3) |
| Mo(5)-O(39) | 1.926(4) | Mo(12)-O(18) | 1.842(4) |
| Mo(5)-O(36) | 1.981(4) | Mo(12)-O(30) | 1.899(3) |
| Mo(5)-O(1)  | 2.457(3) | Mo(12)-O(29) | 1.913(4) |
| Mo(6)-O(33) | 1.671(4) | Mo(12)-O(35) | 1.981(4) |

ElectronicSupplementaryMaterial(ESI)forCrystEngComm.  
Thisjournalis©TheRoyalSocietyofChemistry2022

|                   |            |                   |            |
|-------------------|------------|-------------------|------------|
| Mo(6)-O(37)       | 1.840(4)   | Mo(12)-O(3)       | 2.391(3)   |
| N(1)-Ag(1)-N(5)   | 178.93(18) | O(28)-Mo(6)-O(31) | 83.10(15)  |
| N(1)-Ag(1)-O(35)  | 92.83(14)  | O(33)-Mo(6)-O(2)  | 170.82(17) |
| N(5)-Ag(1)-O(35)  | 86.09(15)  | O(37)-Mo(6)-O(2)  | 84.72(14)  |
| N(1)-Ag(1)-O(12)  | 80.46(15)  | O(32)-Mo(6)-O(2)  | 72.91(14)  |
| N(5)-Ag(1)-O(12)  | 98.95(15)  | O(28)-Mo(6)-O(2)  | 82.62(14)  |
| O(35)-Ag(1)-O(12) | 54.70(10)  | O(31)-Mo(6)-O(2)  | 71.45(13)  |
| O(4)-P(1)-O(2)    | 109.70(19) | O(26)-Mo(7)-O(24) | 102.6(2)   |
| O(4)-P(1)-O(1)    | 109.80(19) | O(26)-Mo(7)-O(6)  | 101.45(19) |
| O(2)-P(1)-O(1)    | 109.24(19) | O(24)-Mo(7)-O(6)  | 95.04(16)  |
| O(4)-P(1)-O(3)    | 109.36(19) | O(26)-Mo(7)-O(38) | 103.15(18) |
| O(2)-P(1)-O(3)    | 109.79(19) | O(24)-Mo(7)-O(38) | 84.92(15)  |
| O(1)-P(1)-O(3)    | 108.93(19) | O(6)-Mo(7)-O(38)  | 154.79(16) |
| O(10)-Mo(1)-O(13) | 103.91(17) | O(26)-Mo(7)-O(34) | 100.69(19) |
| O(10)-Mo(1)-O(25) | 103.00(17) | O(24)-Mo(7)-O(34) | 155.79(16) |
| O(13)-Mo(1)-O(25) | 92.31(16)  | O(6)-Mo(7)-O(34)  | 86.55(16)  |
| O(10)-Mo(1)-O(22) | 98.68(16)  | O(38)-Mo(7)-O(34) | 83.59(15)  |
| O(13)-Mo(1)-O(22) | 88.29(16)  | O(26)-Mo(7)-O(4)  | 170.65(17) |
| O(25)-Mo(1)-O(22) | 157.48(15) | O(24)-Mo(7)-O(4)  | 85.47(14)  |
| O(10)-Mo(1)-O(7)  | 99.93(17)  | O(6)-Mo(7)-O(4)   | 72.89(14)  |
| O(13)-Mo(1)-O(7)  | 156.05(15) | O(38)-Mo(7)-O(4)  | 81.99(13)  |
| O(25)-Mo(1)-O(7)  | 84.56(16)  | O(34)-Mo(7)-O(4)  | 71.88(13)  |
| O(22)-Mo(1)-O(7)  | 85.81(16)  | O(11)-Mo(8)-O(31) | 103.00(19) |
| O(10)-Mo(1)-O(1)  | 170.71(15) | O(11)-Mo(8)-O(29) | 102.53(18) |
| O(13)-Mo(1)-O(1)  | 73.96(14)  | O(31)-Mo(8)-O(29) | 92.21(16)  |
| O(25)-Mo(1)-O(1)  | 86.18(14)  | O(11)-Mo(8)-O(9)  | 101.64(18) |
| O(22)-Mo(1)-O(1)  | 72.35(13)  | O(31)-Mo(8)-O(9)  | 90.14(16)  |
| O(7)-Mo(1)-O(1)   | 82.13(13)  | O(29)-Mo(8)-O(9)  | 154.52(15) |
| O(23)-Mo(2)-O(40) | 103.5(2)   | O(11)-Mo(8)-O(20) | 101.19(18) |
| O(23)-Mo(2)-O(9)  | 101.18(17) | O(31)-Mo(8)-O(20) | 155.81(15) |
| O(40)-Mo(2)-O(9)  | 93.21(16)  | O(29)-Mo(8)-O(20) | 82.34(15)  |
| O(23)-Mo(2)-O(25) | 101.41(18) | O(9)-Mo(8)-O(20)  | 85.18(15)  |
| O(40)-Mo(2)-O(25) | 87.01(16)  | O(11)-Mo(8)-O(2)  | 173.43(16) |
| O(9)-Mo(2)-O(25)  | 156.71(15) | O(31)-Mo(8)-O(2)  | 73.91(14)  |
| O(23)-Mo(2)-O(32) | 99.7(2)    | O(29)-Mo(8)-O(2)  | 83.51(13)  |
| O(40)-Mo(2)-O(32) | 156.52(16) | O(9)-Mo(8)-O(2)   | 72.80(13)  |
| O(9)-Mo(2)-O(32)  | 85.62(16)  | O(20)-Mo(8)-O(2)  | 82.05(13)  |
| O(25)-Mo(2)-O(32) | 85.04(15)  | O(21)-Mo(9)-O(20) | 103.73(18) |
| O(23)-Mo(2)-O(2)  | 169.96(18) | O(21)-Mo(9)-O(5)  | 102.61(18) |
| O(40)-Mo(2)-O(2)  | 85.44(14)  | O(20)-Mo(9)-O(5)  | 95.16(16)  |

ElectronicSupplementaryMaterial(ESI)forCrystEngComm.  
Thisjournalis©TheRoyalSocietyofChemistry2022

|                   |            |                    |            |
|-------------------|------------|--------------------|------------|
| O(9)-Mo(2)-O(2)   | 73.43(13)  | O(21)-Mo(9)-O(18)  | 100.74(18) |
| O(25)-Mo(2)-O(2)  | 83.38(13)  | O(20)-Mo(9)-O(18)  | 85.97(15)  |
| O(32)-Mo(2)-O(2)  | 71.72(13)  | O(5)-Mo(9)-O(18)   | 155.62(15) |
| O(14)-Mo(3)-O(34) | 103.1(2)   | O(21)-Mo(9)-O(6)   | 99.53(18)  |
| O(14)-Mo(3)-O(7)  | 102.94(19) | O(20)-Mo(9)-O(6)   | 155.52(15) |
| O(34)-Mo(3)-O(7)  | 94.06(16)  | O(5)-Mo(9)-O(6)    | 87.04(16)  |
| O(14)-Mo(3)-O(5)  | 101.17(18) | O(18)-Mo(9)-O(6)   | 82.30(15)  |
| O(34)-Mo(3)-O(5)  | 88.15(16)  | O(21)-Mo(9)-O(4)   | 170.28(17) |
| O(7)-Mo(3)-O(5)   | 154.59(16) | O(20)-Mo(9)-O(4)   | 85.77(14)  |
| O(14)-Mo(3)-O(40) | 101.38(19) | O(5)-Mo(9)-O(4)    | 74.07(13)  |
| O(34)-Mo(3)-O(40) | 155.20(16) | O(18)-Mo(9)-O(4)   | 81.75(13)  |
| O(7)-Mo(3)-O(40)  | 84.05(16)  | O(6)-Mo(9)-O(4)    | 71.36(13)  |
| O(5)-Mo(3)-O(40)  | 83.47(15)  | O(16)-Mo(10)-O(28) | 104.17(19) |
| O(14)-Mo(3)-O(4)  | 172.92(17) | O(16)-Mo(10)-O(35) | 102.80(18) |
| O(34)-Mo(3)-O(4)  | 74.00(14)  | O(28)-Mo(10)-O(35) | 94.76(16)  |
| O(7)-Mo(3)-O(4)   | 83.82(14)  | O(16)-Mo(10)-O(8)  | 101.97(18) |
| O(5)-Mo(3)-O(4)   | 72.46(13)  | O(28)-Mo(10)-O(8)  | 86.22(16)  |
| O(40)-Mo(3)-O(4)  | 81.22(13)  | O(35)-Mo(10)-O(8)  | 154.15(16) |
| O(17)-Mo(4)-O(8)  | 103.30(18) | O(16)-Mo(10)-O(27) | 98.93(19)  |
| O(17)-Mo(4)-O(36) | 103.27(18) | O(28)-Mo(10)-O(27) | 156.25(16) |
| O(8)-Mo(4)-O(36)  | 94.17(16)  | O(35)-Mo(10)-O(27) | 85.35(16)  |
| O(17)-Mo(4)-O(13) | 99.77(18)  | O(8)-Mo(10)-O(27)  | 83.65(15)  |
| O(8)-Mo(4)-O(13)  | 155.67(15) | O(16)-Mo(10)-O(3)  | 169.40(17) |
| O(36)-Mo(4)-O(13) | 87.96(16)  | O(28)-Mo(10)-O(3)  | 85.79(14)  |
| O(17)-Mo(4)-O(37) | 100.22(18) | O(35)-Mo(10)-O(3)  | 72.31(13)  |
| O(8)-Mo(4)-O(37)  | 85.29(16)  | O(8)-Mo(10)-O(3)   | 82.03(14)  |
| O(36)-Mo(4)-O(37) | 155.97(16) | O(27)-Mo(10)-O(3)  | 71.58(13)  |
| O(13)-Mo(4)-O(37) | 83.09(16)  | O(15)-Mo(11)-O(27) | 102.75(19) |
| O(17)-Mo(4)-O(1)  | 171.25(16) | O(15)-Mo(11)-O(39) | 103.23(17) |
| O(8)-Mo(4)-O(1)   | 85.25(14)  | O(27)-Mo(11)-O(39) | 93.84(16)  |
| O(36)-Mo(4)-O(1)  | 73.88(14)  | O(15)-Mo(11)-O(30) | 99.62(17)  |
| O(13)-Mo(4)-O(1)  | 72.05(13)  | O(27)-Mo(11)-O(30) | 88.82(16)  |
| O(37)-Mo(4)-O(1)  | 82.15(14)  | O(39)-Mo(11)-O(30) | 155.79(15) |
| O(19)-Mo(5)-O(38) | 103.68(19) | O(15)-Mo(11)-O(24) | 101.24(18) |
| O(19)-Mo(5)-O(22) | 101.79(18) | O(27)-Mo(11)-O(24) | 155.77(15) |
| O(38)-Mo(5)-O(22) | 92.85(16)  | O(39)-Mo(11)-O(24) | 83.97(15)  |
| O(19)-Mo(5)-O(39) | 102.35(19) | O(30)-Mo(11)-O(24) | 83.83(15)  |
| O(38)-Mo(5)-O(39) | 87.43(16)  | O(15)-Mo(11)-O(3)  | 170.77(15) |
| O(22)-Mo(5)-O(39) | 155.07(15) | O(27)-Mo(11)-O(3)  | 74.28(14)  |
| O(19)-Mo(5)-O(36) | 100.32(19) | O(39)-Mo(11)-O(3)  | 85.79(14)  |

ElectronicSupplementaryMaterial(ESI)forCrystEngComm.  
Thisjournalis©TheRoyalSocietyofChemistry2022

|                   |            |                    |            |
|-------------------|------------|--------------------|------------|
| O(38)-Mo(5)-O(36) | 155.90(15) | O(30)-Mo(11)-O(3)  | 71.77(13)  |
| O(22)-Mo(5)-O(36) | 84.30(16)  | O(24)-Mo(11)-O(3)  | 81.49(13)  |
| O(39)-Mo(5)-O(36) | 85.36(16)  | O(12)-Mo(12)-O(18) | 104.79(17) |
| O(19)-Mo(5)-O(1)  | 169.64(17) | O(12)-Mo(12)-O(30) | 100.91(16) |
| O(38)-Mo(5)-O(1)  | 85.01(14)  | O(18)-Mo(12)-O(30) | 92.55(16)  |
| O(22)-Mo(5)-O(1)  | 71.78(13)  | O(12)-Mo(12)-O(29) | 101.45(16) |
| O(39)-Mo(5)-O(1)  | 83.43(13)  | O(18)-Mo(12)-O(29) | 87.06(16)  |
| O(36)-Mo(5)-O(1)  | 71.34(13)  | O(30)-Mo(12)-O(29) | 156.96(15) |
| O(33)-Mo(6)-O(37) | 103.5(2)   | O(12)-Mo(12)-O(35) | 96.84(16)  |
| O(33)-Mo(6)-O(32) | 102.1(2)   | O(18)-Mo(12)-O(35) | 158.22(15) |
| O(37)-Mo(6)-O(32) | 94.64(17)  | O(30)-Mo(12)-O(35) | 85.75(15)  |
| O(33)-Mo(6)-O(28) | 101.9(2)   | O(29)-Mo(12)-O(35) | 86.17(15)  |
| O(37)-Mo(6)-O(28) | 84.88(16)  | O(12)-Mo(12)-O(3)  | 168.01(15) |
| O(32)-Mo(6)-O(28) | 155.44(16) | O(18)-Mo(12)-O(3)  | 86.42(14)  |
| O(33)-Mo(6)-O(31) | 100.96(19) | O(30)-Mo(12)-O(3)  | 73.91(13)  |
| O(37)-Mo(6)-O(31) | 154.45(16) | O(29)-Mo(12)-O(3)  | 83.08(13)  |
| O(32)-Mo(6)-O(31) | 87.20(16)  | O(35)-Mo(12)-O(3)  | 72.23(13)  |
| <b>5</b>          |            |                    |            |
| Ag(1)-N(1)        | 2.130(7)   | Mo(6)-O(9)         | 1.981(5)   |
| Ag(1)-N(5)        | 2.140(7)   | Mo(6)-O(22)        | 2.028(5)   |
| Si(1)-O(2)        | 1.535(5)   | Mo(6)-O(1)         | 2.429(5)   |
| Si(1)-O(3)        | 1.548(5)   | Mo(7)-O(27)        | 1.675(5)   |
| Si(1)-O(40)       | 1.549(5)   | Mo(7)-O(29)        | 1.809(5)   |
| Si(1)-O(1)        | 1.553(5)   | Mo(7)-O(8)         | 1.845(5)   |
| Mo(1)-O(5)        | 1.693(5)   | Mo(7)-O(28)        | 1.979(5)   |
| Mo(1)-O(7)        | 1.810(5)   | Mo(7)-O(25)        | 2.048(5)   |
| Mo(1)-O(9)        | 1.880(5)   | Mo(7)-O(1)         | 2.445(5)   |
| Mo(1)-O(6)        | 1.938(5)   | Mo(8)-O(30)        | 1.678(5)   |
| Mo(1)-O(8)        | 2.024(5)   | Mo(8)-O(32)        | 1.832(5)   |
| Mo(1)-O(1)        | 2.383(5)   | Mo(8)-O(31)        | 1.835(5)   |
| Mo(2)-O(10)       | 1.675(5)   | Mo(8)-O(11)        | 2.011(5)   |
| Mo(2)-O(11)       | 1.839(5)   | Mo(8)-O(29)        | 2.020(5)   |
| Mo(2)-O(6)        | 1.883(5)   | Mo(8)-O(2)         | 2.446(5)   |
| Mo(2)-O(13)       | 1.954(5)   | Mo(9)-O(33)        | 1.681(5)   |
| Mo(2)-O(12)       | 1.996(5)   | Mo(9)-O(20)        | 1.799(5)   |
| Mo(2)-O(2)        | 2.430(5)   | Mo(9)-O(13)        | 1.879(5)   |
| Mo(3)-O(14)       | 1.675(5)   | Mo(9)-O(34)        | 1.975(5)   |
| Mo(3)-O(12)       | 1.815(5)   | Mo(9)-O(31)        | 2.013(5)   |
| Mo(3)-O(16)       | 1.852(5)   | Mo(9)-O(2)         | 2.417(5)   |
| Mo(3)-O(15)       | 2.009(5)   | Mo(10)-O(35)       | 1.691(5)   |
| Mo(3)-O(7)        | 2.017(5)   | Mo(10)-O(37)       | 1.836(5)   |

ElectronicSupplementaryMaterial(ESI)forCrystEngComm.  
Thisjournalis©TheRoyalSocietyofChemistry2022

|                   |           |                   |           |
|-------------------|-----------|-------------------|-----------|
| Mo(3)-O(3)        | 2.416(5)  | Mo(10)-O(34)      | 1.853(5)  |
| Mo(4)-O(17)       | 1.681(5)  | Mo(10)-O(36)      | 1.981(5)  |
| Mo(4)-O(19)       | 1.834(5)  | Mo(10)-O(19)      | 1.994(5)  |
| Mo(4)-O(18)       | 1.838(5)  | Mo(10)-O(40)      | 2.399(5)  |
| Mo(4)-O(16)       | 1.988(5)  | Mo(11)-O(38)      | 1.673(5)  |
| Mo(4)-O(20)       | 2.027(5)  | Mo(11)-O(23)      | 1.834(5)  |
| Mo(4)-O(3)        | 2.428(5)  | Mo(11)-O(36)      | 1.868(5)  |
| Mo(5)-O(21)       | 1.693(5)  | Mo(11)-O(26)      | 1.966(5)  |
| Mo(5)-O(22)       | 1.810(5)  | Mo(11)-O(39)      | 2.008(5)  |
| Mo(5)-O(15)       | 1.847(5)  | Mo(11)-O(40)      | 2.440(5)  |
| Mo(5)-O(23)       | 1.990(5)  | Mo(12)-O(40)      | 1.672(5)  |
| Mo(5)-O(18)       | 2.021(5)  | Mo(12)-O(28)      | 1.822(5)  |
| Mo(5)-O(3)        | 2.420(5)  | Mo(12)-O(39)      | 1.848(5)  |
| Mo(6)-O(24)       | 1.682(5)  | Mo(12)-O(32)      | 1.998(5)  |
| Mo(6)-O(25)       | 1.821(5)  | Mo(12)-O(37)      | 2.013(5)  |
| Mo(6)-O(26)       | 1.842(5)  | Mo(12)-O(40)      | 2.407(5)  |
| N(1)-Ag(1)-N(5)   | 179.4(3)  | O(26)-Mo(6)-O(1)  | 87.05(19) |
| O(2)-Si(1)-O(3)   | 110.1(3)  | O(9)-Mo(6)-O(1)   | 71.60(18) |
| O(2)-Si(1)-O(40)  | 109.5(3)  | O(22)-Mo(6)-O(1)  | 81.04(19) |
| O(3)-Si(1)-O(40)  | 109.7(3)  | O(27)-Mo(7)-O(29) | 104.6(2)  |
| O(2)-Si(1)-O(1)   | 109.7(3)  | O(27)-Mo(7)-O(8)  | 103.0(2)  |
| O(3)-Si(1)-O(1)   | 109.0(3)  | O(29)-Mo(7)-O(8)  | 98.1(2)   |
| O(40)-Si(1)-O(1)  | 108.7(3)  | O(27)-Mo(7)-O(28) | 101.2(2)  |
| O(5)-Mo(1)-O(7)   | 105.4(2)  | O(29)-Mo(7)-O(28) | 86.8(2)   |
| O(5)-Mo(1)-O(9)   | 100.9(2)  | O(8)-Mo(7)-O(28)  | 153.2(2)  |
| O(7)-Mo(1)-O(9)   | 95.4(2)   | O(27)-Mo(7)-O(25) | 97.5(2)   |
| O(5)-Mo(1)-O(6)   | 101.0(2)  | O(29)-Mo(7)-O(25) | 156.4(2)  |
| O(7)-Mo(1)-O(6)   | 87.4(2)   | O(8)-Mo(7)-O(25)  | 84.6(2)   |
| O(9)-Mo(1)-O(6)   | 156.4(2)  | O(28)-Mo(7)-O(25) | 80.9(2)   |
| O(5)-Mo(1)-O(8)   | 95.4(2)   | O(27)-Mo(7)-O(1)  | 168.3(2)  |
| O(7)-Mo(1)-O(8)   | 158.6(2)  | O(29)-Mo(7)-O(1)  | 87.0(2)   |
| O(9)-Mo(1)-O(8)   | 85.3(2)   | O(8)-Mo(7)-O(1)   | 73.18(19) |
| O(6)-Mo(1)-O(8)   | 83.8(2)   | O(28)-Mo(7)-O(1)  | 80.87(19) |
| O(5)-Mo(1)-O(1)   | 166.6(2)  | O(25)-Mo(7)-O(1)  | 71.25(18) |
| O(7)-Mo(1)-O(1)   | 87.7(2)   | O(30)-Mo(8)-O(32) | 104.0(2)  |
| O(9)-Mo(1)-O(1)   | 74.26(19) | O(30)-Mo(8)-O(31) | 102.7(3)  |
| O(6)-Mo(1)-O(1)   | 82.43(19) | O(32)-Mo(8)-O(31) | 97.0(2)   |
| O(8)-Mo(1)-O(1)   | 71.87(19) | O(30)-Mo(8)-O(11) | 100.1(2)  |
| O(10)-Mo(2)-O(11) | 103.0(2)  | O(32)-Mo(8)-O(11) | 153.6(2)  |
| O(10)-Mo(2)-O(6)  | 102.8(2)  | O(31)-Mo(8)-O(11) | 87.7(2)   |
| O(11)-Mo(2)-O(6)  | 94.5(2)   | O(30)-Mo(8)-O(29) | 101.6(3)  |

ElectronicSupplementaryMaterial(ESI)forCrystEngComm.  
Thisjournalis©TheRoyalSocietyofChemistry2022

|                   |           |                    |           |
|-------------------|-----------|--------------------|-----------|
| O(10)-Mo(2)-O(13) | 100.8(2)  | O(32)-Mo(8)-O(29)  | 84.4(2)   |
| O(11)-Mo(2)-O(13) | 89.9(2)   | O(31)-Mo(8)-O(29)  | 154.5(2)  |
| O(6)-Mo(2)-O(13)  | 154.3(2)  | O(11)-Mo(8)-O(29)  | 80.5(2)   |
| O(10)-Mo(2)-O(12) | 101.3(2)  | O(30)-Mo(8)-O(2)   | 170.5(2)  |
| O(11)-Mo(2)-O(12) | 155.6(2)  | O(32)-Mo(8)-O(2)   | 85.1(2)   |
| O(6)-Mo(2)-O(12)  | 82.8(2)   | O(31)-Mo(8)-O(2)   | 73.2(2)   |
| O(13)-Mo(2)-O(12) | 82.9(2)   | O(11)-Mo(8)-O(2)   | 71.47(19) |
| O(10)-Mo(2)-O(2)  | 172.7(2)  | O(29)-Mo(8)-O(2)   | 81.60(19) |
| O(11)-Mo(2)-O(2)  | 74.52(19) | O(33)-Mo(9)-O(20)  | 104.7(3)  |
| O(6)-Mo(2)-O(2)   | 84.3(2)   | O(33)-Mo(9)-O(13)  | 101.8(2)  |
| O(13)-Mo(2)-O(2)  | 72.45(18) | O(20)-Mo(9)-O(13)  | 96.2(2)   |
| O(12)-Mo(2)-O(2)  | 81.04(19) | O(33)-Mo(9)-O(34)  | 100.7(2)  |
| O(14)-Mo(3)-O(12) | 104.6(2)  | O(20)-Mo(9)-O(34)  | 87.0(2)   |
| O(14)-Mo(3)-O(16) | 103.0(2)  | O(13)-Mo(9)-O(34)  | 155.6(2)  |
| O(12)-Mo(3)-O(16) | 97.4(2)   | O(33)-Mo(9)-O(31)  | 98.5(2)   |
| O(14)-Mo(3)-O(15) | 98.4(2)   | O(20)-Mo(9)-O(31)  | 155.9(2)  |
| O(12)-Mo(3)-O(15) | 154.8(2)  | O(13)-Mo(9)-O(31)  | 85.5(2)   |
| O(16)-Mo(3)-O(15) | 87.5(2)   | O(34)-Mo(9)-O(31)  | 82.1(2)   |
| O(14)-Mo(3)-O(7)  | 99.9(2)   | O(33)-Mo(9)-O(2)   | 168.9(2)  |
| O(12)-Mo(3)-O(7)  | 85.5(2)   | O(20)-Mo(9)-O(2)   | 86.1(2)   |
| O(16)-Mo(3)-O(7)  | 155.4(2)  | O(13)-Mo(9)-O(2)   | 73.94(19) |
| O(15)-Mo(3)-O(7)  | 80.2(2)   | O(34)-Mo(9)-O(2)   | 82.23(19) |
| O(14)-Mo(3)-O(3)  | 168.8(2)  | O(31)-Mo(9)-O(2)   | 71.16(18) |
| O(12)-Mo(3)-O(3)  | 86.59(19) | O(35)-Mo(10)-O(37) | 103.8(2)  |
| O(16)-Mo(3)-O(3)  | 74.70(19) | O(35)-Mo(10)-O(34) | 104.0(2)  |
| O(15)-Mo(3)-O(3)  | 70.78(18) | O(37)-Mo(10)-O(34) | 95.6(2)   |
| O(7)-Mo(3)-O(3)   | 81.12(18) | O(35)-Mo(10)-O(36) | 97.2(2)   |
| O(17)-Mo(4)-O(19) | 103.4(2)  | O(37)-Mo(10)-O(36) | 87.9(2)   |
| O(17)-Mo(4)-O(18) | 103.4(2)  | O(34)-Mo(10)-O(36) | 157.0(2)  |
| O(19)-Mo(4)-O(18) | 96.9(2)   | O(35)-Mo(10)-O(19) | 99.1(2)   |
| O(17)-Mo(4)-O(16) | 100.0(2)  | O(37)-Mo(10)-O(19) | 156.2(2)  |
| O(19)-Mo(4)-O(16) | 153.9(2)  | O(34)-Mo(10)-O(19) | 84.8(2)   |
| O(18)-Mo(4)-O(16) | 88.7(2)   | O(36)-Mo(10)-O(19) | 83.0(2)   |
| O(17)-Mo(4)-O(20) | 100.7(2)  | O(35)-Mo(10)-O(40) | 168.8(2)  |
| O(19)-Mo(4)-O(20) | 83.9(2)   | O(37)-Mo(10)-O(40) | 74.81(19) |
| O(18)-Mo(4)-O(20) | 154.9(2)  | O(34)-Mo(10)-O(40) | 87.2(2)   |
| O(16)-Mo(4)-O(20) | 80.5(2)   | O(36)-Mo(10)-O(40) | 71.69(19) |
| O(17)-Mo(4)-O(3)  | 171.9(2)  | O(19)-Mo(10)-O(40) | 81.45(19) |
| O(19)-Mo(4)-O(3)  | 84.7(2)   | O(38)-Mo(11)-O(23) | 104.0(2)  |
| O(18)-Mo(4)-O(3)  | 74.6(2)   | O(38)-Mo(11)-O(36) | 102.0(2)  |
| O(16)-Mo(4)-O(3)  | 72.26(18) | O(23)-Mo(11)-O(36) | 95.1(2)   |



ElectronicSupplementaryMaterial(ESI)forCrystEngComm.  
Thisjournalis©TheRoyalSocietyofChemistry2022

|                   |           |                    |           |
|-------------------|-----------|--------------------|-----------|
| O(20)-Mo(4)-O(3)  | 80.50(18) | O(38)-Mo(11)-O(26) | 101.7(2)  |
| O(21)-Mo(5)-O(22) | 103.0(2)  | O(23)-Mo(11)-O(26) | 87.1(2)   |
| O(21)-Mo(5)-O(15) | 101.4(2)  | O(36)-Mo(11)-O(26) | 154.9(2)  |
| O(22)-Mo(5)-O(15) | 97.4(2)   | O(38)-Mo(11)-O(39) | 99.4(2)   |
| O(21)-Mo(5)-O(23) | 102.9(2)  | O(23)-Mo(11)-O(39) | 155.9(2)  |
| O(22)-Mo(5)-O(23) | 85.5(2)   | O(36)-Mo(11)-O(39) | 85.1(2)   |
| O(15)-Mo(5)-O(23) | 154.2(2)  | O(26)-Mo(11)-O(39) | 83.0(2)   |
| O(21)-Mo(5)-O(18) | 99.1(2)   | O(38)-Mo(11)-O(40) | 169.4(2)  |
| O(22)-Mo(5)-O(18) | 156.4(2)  | O(23)-Mo(11)-O(40) | 85.7(2)   |
| O(15)-Mo(5)-O(18) | 86.2(2)   | O(36)-Mo(11)-O(40) | 72.43(19) |
| O(23)-Mo(5)-O(18) | 81.5(2)   | O(26)-Mo(11)-O(40) | 82.83(18) |
| O(21)-Mo(5)-O(3)  | 169.6(2)  | O(39)-Mo(11)-O(40) | 71.35(18) |
| O(22)-Mo(5)-O(3)  | 86.7(2)   | O(40)-Mo(12)-O(28) | 103.9(2)  |
| O(15)-Mo(5)-O(3)  | 73.15(19) | O(40)-Mo(12)-O(39) | 103.1(2)  |
| O(23)-Mo(5)-O(3)  | 81.51(19) | O(28)-Mo(12)-O(39) | 96.5(2)   |
| O(18)-Mo(5)-O(3)  | 71.95(19) | O(40)-Mo(12)-O(32) | 99.6(2)   |
| O(24)-Mo(6)-O(25) | 103.3(2)  | O(28)-Mo(12)-O(32) | 85.8(2)   |
| O(24)-Mo(6)-O(26) | 103.6(2)  | O(39)-Mo(12)-O(32) | 155.9(2)  |
| O(25)-Mo(6)-O(26) | 97.4(2)   | O(40)-Mo(12)-O(37) | 98.3(2)   |
| O(24)-Mo(6)-O(9)  | 97.9(2)   | O(28)-Mo(12)-O(37) | 155.7(2)  |
| O(25)-Mo(6)-O(9)  | 88.6(2)   | O(39)-Mo(12)-O(37) | 87.7(2)   |
| O(26)-Mo(6)-O(9)  | 155.6(2)  | O(32)-Mo(12)-O(37) | 81.0(2)   |
| O(24)-Mo(6)-O(22) | 99.6(2)   | O(40)-Mo(12)-O(40) | 169.9(2)  |
| O(25)-Mo(6)-O(22) | 156.1(2)  | O(28)-Mo(12)-O(40) | 86.2(2)   |
| O(26)-Mo(6)-O(22) | 83.7(2)   | O(39)-Mo(12)-O(40) | 74.66(19) |
| O(9)-Mo(6)-O(22)  | 81.5(2)   | O(32)-Mo(12)-O(40) | 81.59(18) |
| O(24)-Mo(6)-O(1)  | 169.4(2)  | O(37)-Mo(12)-O(40) | 71.82(18) |
| O(25)-Mo(6)-O(1)  | 75.2(2)   |                    |           |

1 Symmetry transformations used to generate equivalent atoms:

#1 -x+2,-y+1,-z+1 #2 -x+2,-y,-z+1

2 Symmetry transformations used to generate equivalent atoms:

#1 -x,-y+2,-z #2 -x+1/2,y,-z+1/2
